# Supplementary material
Source: PubMed Central journal article supplement (PMC6889272)
Supplement: 41418_2019_283_MOESM2_ESM.pdf [file 41418_2019_283_MOESM2_ESM.pdf]

**Supplemental Table 1: antibody information**

| Name                                      | Origin                 | Cat. Number | Applications              |
|-------------------------------------------|------------------------|-------------|---------------------------|
| Rabbit anti-L3MBTL2                       | Sigma-Aldrich          | HPA000815   | IHC (1:100), WB (1:1000)  |
| Rabbit anti-L3MBTL2                       | Boster                 | A08416      | IHC (1:150)               |
| Rabbit anti-H4tetraAcK                    | Abcam                  | ab177790    | IF (1:4000), WB (1:10000) |
| Rabbit anti-H2BAcK16                      | Active Motif           | #39121      | IF(1:1600), WB (1:1000)   |
| Mouse anti-Hup 1N<br>(Protamine 1)        | Briar Patch Bioscience | None        | IF (1:100), WB (1:1000)   |
| Rabbit anti-H4                            | Abcam                  | ab10158     | WB (1:1000)               |
| Goat anti-GAPDH                           | Santa Cruz             | sc-25778    | WB (1:800)                |
| Rabbit anti-Lamin B1                      | Abcam                  | ab16048     | WB (1:2000)               |
| Goat anti-H2B                             | Santa Cruz             | sc-8650     | WB (1:1000)               |
| Rabbit anti-P21                           | Santa Cruz             | sc-397      | WB (1:1000)               |
| Rabbit anti-γH2AX                         | Cell Signaling         | #9718       | IF (1:400), WB(1:1000)    |
| Rabbit anti-H2AX                          | Cell Signaling         | #2595       | WB (1:1000)               |
| Rabbit anti-H3AcK18                       | Cell Signaling         | #9675       | WB (1:2000)               |
| Rabbit anti-H3                            | ImmunoWay              | YT2162      | WB (1:1000)               |
| Mouse anti-SYCP3                          | Abcam                  | ab97672     | IF (1:200)                |
| Rabbit anti-H3K27me3                      | Millipore              | #07-449     | IF (1:100)                |
| Goat anti-SYCP1                           | Santa Cruz             | sc-20837    | IF (1:50)                 |
| Rabbit anti-MLH1                          | Abcam                  | ab92312     | IF (1:50)                 |
| Rabbit anti-H3K9me1                       | Cell Signaling         | 14186       | IF (1:1200)               |
| Rabbit anti-53bp1                         | Bethyl                 | A300-273A   | IF (1:100)                |
| Rabbit anti-RNF8                          | Abcam                  | ab105362    | WB (1:1000)               |
| Rabbit anti-RNF8                          | Proteintech            | 14112-1-AP  | IHC (1:100)               |
| Rabbit anti-ubH2A                         | Cell Signaling         | #8240       | WB (1:1000); IHC (1:200)  |
| Mouse anti-ubH2A                          | Millipore              | 05-678      | IF (1:100)                |
| Anti-Flag                                 | Sigma- Aldrich         | F1804       | WB (1:1000)               |
| Anti-HA                                   | Abcam                  | ab18181     | WB (1:1000)               |
| Donkey anti-Goat (HRP)                    | Santa Cruz             | sc-2058     | WB (1:5000)               |
| Rabbit Anti-Mouse (HRP)                   | Sigma- Aldrich         | A-9044      | WB (1:5000)               |
| Goat Anti-Rabbit (HRP)                    | Santa Cruz             | sc-2004     | WB (1:5000)               |
| Donkey anti- Goat (Alexa<br>Fluor® 555)   | Invitrogen             | A21432      | IF (1:400)                |
| Donkey anti-Mouse (Alexa<br>Fluor® 488)   | Invitrogen             | A21202      | IF (1:100)                |
| Donkey anti- Rabbit (Alexa<br>Fluor® 555) | Invitrogen             | A31572      | IF (1:400)                |

**Supplemental Table 2 : Primers for real-time PCR**

| Gene    | Species | Primers forward (5'-3') | Primers reverse (5'-3')  | Size (bp) | Accession #  |
|---------|---------|-------------------------|--------------------------|-----------|--------------|
| L3mbtl2 | Mouse   | TCTACACAGAAGGTGGCTGGTTC | CATCAGGTAACCATCCAAGAGCAC | 119       | NM_001289711 |
| Rpl19   | Mouse   | AGGCATATGGGCAT          | TTGACCTTCAGGTAC          | 164       | NM_009078    |
| Piwil2  | Mouse   | TTGGCCTCAAGTCCTAGAC     | GAACATGGACACCAAACCTACA   | 145       | NM_021308    |
| Stk31   | Mouse   | GGAACAGTTATTGCTCAGGCT   | TTAGGATCAGGTTTCTTTGCCTC  | 131       | NM_029916    |
| Tcam1   | Mouse   | TGGTAGAGTTTGGACACTCCC   | CTCCCCTGCACAAGAGAAGA     | 185       | NM_029467    |
| Hoxb8   | Mouse   | TGCGCCCAATTATTACTG      | AACTCCTGGATTGCGAAGGG     | 115       | NM_010461    |
| Foxa2   | Mouse   | CCCTACGCCAACATGAACTCG   | GTTCTGCCGGTAGAAAGGGA     | 222       | NM_010446    |
| Rhox5   | Mouse   | ACTCGGAAGAACAGCATGATG   | CCCTGGTGCCACTATCCTT      | 204       | NM_008818    |
| Ddx4    | Mouse   | CCTCACGTGCTTCTATGTTCC   | CATCTCTCCAGAAGGCCCATC    | 210       | NM_001145885 |
| Tnp1    | Mouse   | TCCTCACAAGGGCGTCAA      | GCTCATTGCCGCATCACA       | 125       | NM_009407    |
| Tnp2    | Mouse   | ACAGAGCTAAGAGGCGTAGCTC  | TCCCAACAGTCCCCTAGTGATG   | 111       | NM_013694    |
| Prm1    | Mouse   | AAGATGTCGCAGACGGAGGAG   | CACCTATGGTGATGAGCGGC     | 84        | NM_013637    |
| Prm2    | Mouse   | ATGGTTCGCTACCGAATGAGG   | CTCCGCCTTCTGCATGACC      | 221       | NM_008933    |
| Brdt    | Mouse   | AGTGGCGGGTTGACGAATC     | AGTCAGGCAGCTTTAGTTTCAC   | 124       | NM_054054    |
| Rnf8    | Mouse   | TGTCCTAACGTCAAGAGACAGA  | GCTTCAGGTCGCACTCTCC      | 206       | NM_021419    |
