# Supplementary material
Source: PubMed Central journal article supplement (PMC6889272)
Supplement: 41418_2019_283_MOESM3_ESM.pdf [file 41418_2019_283_MOESM3_ESM.pdf]

Supplemental Table 3

| GeneID      | Length | L3_Ctrl-Expression | L3_cKO-Expression | log2FoldChange(L Padj) | Up/Down-R Pvalue | Symbol                   |
|-------------|--------|--------------------|-------------------|------------------------|------------------|--------------------------|
| 382551      | 738    | 3.427280926        | 31.45992719       | 3.198378976            | 1.58E-05 Up      | 3.40E-09 Cd300ld3        |
| 66300       | 1697   | 5.353710902        | 40.66170744       | 2.925059656            | 0.000140649 Up   | 4.24E-08 Inafm1          |
| 67446       | 1491   | 2.893746742        | 18.31396995       | 2.661933991            | 0.002171657 Up   | 1.22E-06 Dusp28          |
| BGI_novel_1 | 1778   | 2.26184504         | 11.12967888       | 2.298839969            | 0.011387464 Up   | 2.95E-05 NA              |
| 214639      | 1390   | 17.37953779        | 80.99494718       | 2.220442195            | 0.00488696 Up    | 4.94E-06 4930486L24Rik   |
| 27279       | 980    | 27.62415014        | 122.1152559       | 2.144241463            | 0.00560854 Up    | 9.66E-06 Tnfrsf12a       |
| 16009       | 2456   | 61.20884954        | 270.1035245       | 2.141700308            | 0.002462962 Up   | 1.70E-06 Igfbp3          |
| 385354      | 4647   | 4.778417292        | 18.99531752       | 1.991039075            | 0.017847561 Up   | 0.00013815 Frmd7         |
| 16619       | 889    | 119.3503352        | 472.3028539       | 1.984509635            | 0.017930932 Up   | 0.000152544 Klk1b27      |
| 21857       | 903    | 25.79953223        | 100.7505478       | 1.96537087             | 0.017930932 Up   | 0.000157099 Timp1        |
| 67706       | 771    | 3.371750959        | 13.07366113       | 1.955093322            | 0.022935054 Up   | 0.000374324 Tmem179b     |
| 17751       | 538    | 24.50715392        | 92.68743007       | 1.919170749            | 0.013374759 Up   | 4.04E-05 Mt3             |
| 77323       | 2312   | 6.700055694        | 24.96163915       | 1.897467681            | 0.01609485 Up    | 9.32E-05 9430041J12Rik   |
| 668489      | 1288   | 8.945998003        | 33.03829796       | 1.884825024            | 0.025157319 Up   | 0.00053876 Gm9f199       |
| 11830       | 1551   | 16.25521557        | 59.45559964       | 1.870910003            | 0.022968444 Up   | 0.000388746 Aqp5         |
| 1.01E+08    | 1776   | 6.51421633         | 23.70697512       | 1.863648059            | 0.024480702 Up   | 0.000494355 LOC100503496 |
| 22417       | 3823   | 17.00613998        | 61.75240073       | 1.860439507            | 0.017930932 Up   | 0.000155438 Txn1         |
| 59006       | 1153   | 13.33395144        | 48.24274387       | 1.855207586            | 0.020155113 Up   | 0.000253709 Myoz2        |
| 93714       | 4540   | 5.170181903        | 18.69531753       | 1.85439003             | 0.027310063 Up   | 0.000638102 Pcdhga6      |
| BGI_novel_1 | 953    | 2.828767662        | 10.11478641       | 1.838220263            | 0.028636595 Up   | 0.00072218 NA            |
| 11552       | 3936   | 5.612320298        | 20.05485402       | 1.837282213            | 0.023464904 Up   | 0.000432997 Adra2b       |
| 213469      | 3197   | 7.136528912        | 25.45129107       | 1.834444394            | 0.020531715 Up   | 0.000273497 Lg13         |
| 16616       | 907    | 181.0892723        | 644.60335         | 1.831710602            | 0.022274541 Up   | 0.000346342 Klk1b21      |
| 19885       | 2627   | 36.75631274        | 130.4872226       | 1.827844591            | 0.01353896 Up    | 5.72E-05 Rorc            |
| 225266      | 4018   | 62.81303781        | 220.2211452       | 1.809817051            | 0.010206271 Up   | 2.34E-05 Kihl14          |
| 16867       | 1801   | 87.15383175        | 302.6434498       | 1.795983127            | 0.004257693 Up   | 3.49E-06 Lhcg9           |
| 69049       | 1350   | 32.28147549        | 111.9729678       | 1.794372057            | 0.014284057 Up   | 7.27E-05 Nat8f5          |
| 628900      | 2083   | 13.7733766         | 47.54360583       | 1.78736904             | 0.031567216 Up   | 0.000922016 Serpina3i    |
| 14266       | 4486   | 36.07773878        | 120.672122        | 1.741911596            | 0.01390321 Up    | 6.43E-05 Aff2            |
| 50905       | 2061   | 77.24124918        | 257.1188517       | 1.734991989            | 0.006529969 Up   | 1.15E-05 Il17rb          |
| 16494       | 5853   | 10.58979246        | 35.11510836       | 1.729417571            | 0.02972578 Up    | 0.000791936 Kcna6        |
| 30878       | 3148   | 165.1734997        | 542.4787112       | 1.715584282            | 0.00488696 Up    | 5.06E-06 Aplin           |
| 394435      | 2293   | 135.5107145        | 443.1117391       | 1.709263622            | 0.004979915 Up   | 7.51E-06 Ugt1a6b         |
| 380660      | 2175   | 23.77430569        | 77.70401823       | 1.708585996            | 0.019270576 Up   | 0.000202427 Accs3        |
| 16615       | 864    | 24.41158705        | 79.51013763       | 1.703572727            | 0.014284057 Up   | 7.21E-05 Klk1b16         |
| BGI_novel_1 | 2906   | 11.69927765        | 38.05977058       | 1.701847409            | 0.027623379 Up   | 0.000657123 NA           |
| 20716       | 2084   | 183.6990639        | 596.0664624       | 1.698128927            | 0.045085169 Up   | 0.002027151 Serpina3n    |
| 381835      | 3152   | 3.459736574        | 11.17910046       | 1.692070005            | 0.045691225 Up   | 0.00209984 Sbk3          |
| 19659       | 2628   | 86.96504701        | 280.9498694       | 1.691805155            | 0.00560854 Up    | 9.39E-06 Rbp1            |
| 80890       | 7386   | 33.95969054        | 109.7059264       | 1.691746246            | 0.017959615 Up   | 0.000161826 Trim2        |
| 15490       | 4574   | 92.67282124        | 298.4095664       | 1.687075589            | 0.004716723 Up   | 4.27E-06 Hsd17b7         |
| 214531      | 3245   | 8.511556275        | 27.13909275       | 1.672877645            | 0.020677778 Up   | 0.000279917 Tmprss13     |
| 13646       | 855    | 31.39063878        | 99.89636217       | 1.670097755            | 0.028828332 Up   | 0.000739443 Klk1b22      |
| 140795      | 1666   | 9.508440814        | 30.16203706       | 1.665453174            | 0.018640709 Up   | 0.00017968 P2ry14        |
| 77552       | 1190   | 9.719570831        | 30.80258664       | 1.664086988            | 0.038375491 Up   | 0.001459628 Shisa4       |
| 11827       | 1416   | 131.3923515        | 414.002792        | 1.6557592              | 0.035789102 Up   | 0.001255916 Aqp2         |
| 210356      | 6942   | 67.40699698        | 211.358072        | 1.648718953            | 0.004898185 Up   | 6.22E-06 Nckap5          |
| 55948       | 1616   | 23.79108807        | 74.50450107       | 1.646906332            | 0.024629628 Up   | 0.000500443 Sfn          |
| 107587      | 1710   | 129.5259195        | 404.5873055       | 1.643210229            | 0.004898185 Up   | 6.25E-06 Osr2            |
| 68396       | 1274   | 87.46187869        | 273.1139691       | 1.642776863            | 0.01353896 Up    | 5.49E-05 Nat8            |
| 269019      | 3765   | 30.35897746        | 94.69216531       | 1.641121865            | 0.035605657 Up   | 0.001227082 Stk32a       |
| 77574       | 5036   | 66.78918823        | 208.0165318       | 1.639011704            | 0.01390321 Up    | 6.31E-05 Tcaf1           |
| 16617       | 899    | 171.1444944        | 532.9928037       | 1.638901172            | 0.047055195 Up   | 0.002218968 Klk1b24      |
| 210719      | 3201   | 8.252314255        | 25.57852384       | 1.632062341            | 0.036277926 Up   | 0.001298042 Mlx          |
| 58909       | 4300   | 20.90196013        | 64.31862924       | 1.621598419            | 0.016828865 Up   | 0.000108179 Fam13a       |
| 114664      | 1699   | 156.9229098        | 480.5960211       | 1.614768711            | 0.006883392 Up   | 1.25E-05 Hsd17b11        |
| 18767       | 3683   | 42.88140616        | 131.2823173       | 1.614248489            | 0.025687043 Up   | 0.000567724 Pkia         |
| 1E+08       | 4828   | 85.15457592        | 260.5132413       | 1.613200741            | 0.001566864 Up   | 8.11E-07 Uckl1os         |
| 68027       | 1696   | 7.510166268        | 22.73956392       | 1.598287834            | 0.044591294 Up   | 0.00197617 Tmem178       |
| 278097      | 2034   | 65.14039771        | 197.1811294       | 1.597897057            | 0.01353896 Up    | 4.75E-05 Armcx6          |
| BGI_novel_1 | 3308   | 54.31463033        | 163.7768351       | 1.59231855             | 0.01497544 Up    | 8.13E-05 NA              |
| 66264       | 856    | 29.5167833         | 89.00086649       | 1.592283875            | 0.018393264 Up   | 0.000172856 Ccdc28b      |
| 319317      | 5243   | 290.1102748        | 868.5222385       | 1.581961397            | 0.004887995 Up   | 5.41E-06 Snhg11          |
| 58176       | 1912   | 61.24575574        | 183.2337313       | 1.581003337            | 0.01390321 Up    | 6.68E-05 Rbhg            |
| 245026      | 8833   | 40.0702071         | 119.3891576       | 1.575069952            | 0.032960598 Up   | 0.001009333 Col6a6       |
| 16592       | 969    | 79.90793336        | 237.0280579       | 1.568647198            | 0.018640709 Up   | 0.000180003 Fabp5        |
| 16816       | 1370   | 16.22712318        | 47.95519884       | 1.563279972            | 0.02916224 Up    | 0.000754293 Lcat         |
| 192187      | 7995   | 265.94221          | 782.9854686       | 1.557872755            | 0.010307875 Up   | 2.49E-05 Stab1           |
| 21938       | 4913   | 45.91676283        | 135.1129216       | 1.557072814            | 0.020472888 Up   | 0.000271005 Tnfrsf1b     |
| 244757      | 3698   | 168.2550664        | 494.3827785       | 1.554978542            | 0.007151595 Up   | 1.36E-05 Glb1l2          |
| 20856       | 1793   | 12.41614635        | 36.3263393        | 1.548798521            | 0.047191071 Up   | 0.00223248 Stc2          |
| 17240       | 1577   | 6.828255864        | 19.95468888       | 1.547138761            | 0.044438569 Up   | 0.001963596 Mdf1         |
| 18430       | 5625   | 184.4652818        | 538.5917526       | 1.545842826            | 0.00560854 Up    | 9.67E-06 Oxtr            |
| 20259       | 3008   | 10.20920939        | 29.79280011       | 1.545092576            | 0.045107523 Up   | 0.002035035 Scin         |
| 68151       | 2696   | 74.59244905        | 217.4982349       | 1.543902193            | 0.01609485 Up    | 9.42E-05 Wls             |
| 217198      | 3007   | 31.70574476        | 91.86151581       | 1.534716324            | 0.031567216 Up   | 0.000925318 Plekhh3      |
| 67473       | 2634   | 19.31047539        | 55.61569214       | 1.52610832             | 0.033843391 Up   | 0.001097514 Slc47a1      |
| 13036       | 1629   | 185.3901261        | 533.384808        | 1.524612327            | 0.011863443 Up   | 3.32E-05 Ctsb            |
| 78688       | 2869   | 8.012553737        | 23.03764611       | 1.523659283            | 0.044591294 Up   | 0.001978316 Nol3         |

|             |      |             |             |             |             |      |             |               |
|-------------|------|-------------|-------------|-------------|-------------|------|-------------|---------------|
| 64385       | 2143 | 21.10722937 | 60.6670593  | 1.523176165 | 0.028277921 | Up   | 0.000696965 | Cyp4f14       |
| 16409       | 4679 | 21.4206185  | 61.42926266 | 1.51992593  | 0.024005571 | Up   | 0.000478547 | Itgam         |
| 26427       | 2284 | 115.8144826 | 331.9469903 | 1.519137198 | 0.00560854  | Up   | 9.45E-06    | Creb3l1       |
| 229791      | 5690 | 77.56915604 | 222.0250733 | 1.517167599 | 0.004887995 | Up   | 5.61E-06    | Plppr4        |
| 19116       | 8620 | 638.467561  | 1823.866575 | 1.514314966 | 0.030251863 | Prlr | 0.000832034 | Prlr          |
| 236790      | 5496 | 155.1744693 | 443.0066117 | 1.513437019 | 0.003101929 | Up   | 2.27E-06    | Ddx26b        |
| 69142       | 1109 | 32.93281724 | 93.82328608 | 1.510420098 | 0.039195312 | Up   | 0.001539291 | Cd209f        |
| 56358       | 932  | 60.00348251 | 170.9426665 | 1.510394391 | 0.016828865 | Up   | 0.000116707 | Copz2         |
| 56213       | 2051 | 156.3061968 | 443.3094304 | 1.503939077 | 0.017851899 | Up   | 0.000140982 | Htra1         |
| 15203       | 4610 | 16.70640346 | 47.38020083 | 1.503883129 | 0.046951018 | Up   | 0.002208198 | Heph          |
| 64540       | 1437 | 124.9469126 | 353.7472032 | 1.501403489 | 0.020472888 | Up   | 0.000265339 | Tspan4        |
| 109222      | 1411 | 146.4841049 | 413.9583648 | 1.498741546 | 0.01326225  | Up   | 3.91E-05    | Rarres1       |
| 68119       | 1548 | 117.9746571 | 333.294089  | 1.498318754 | 0.01353896  | Up   | 5.70E-05    | Cmtm3         |
| 69660       | 2325 | 78.32075296 | 221.230804  | 1.498085739 | 0.012342012 | Up   | 3.51E-05    | Tmbim1        |
| 15487       | 1286 | 539.0884531 | 1520.903505 | 1.496334709 | 0.040602775 | Up   | 0.001645325 | Hsd17b3       |
| 74644       | 2425 | 68.85861033 | 194.2375558 | 1.496113202 | 0.023594022 | Up   | 0.000440498 | 4930426D05Rik |
| 23936       | 3952 | 99.78524672 | 281.0475097 | 1.493915598 | 0.020012906 | Up   | 0.000245888 | Lynx1         |
| 98170       | 3513 | 78.25014901 | 220.3450756 | 1.49359925  | 0.01609485  | Up   | 9.41E-05    | Tmem132a      |
| 68047       | 1701 | 93.75664469 | 263.5961275 | 1.49133633  | 0.013596494 | Up   | 5.80E-05    | Mpnd          |
| 14132       | 1738 | 94.32369627 | 264.1938701 | 1.485904834 | 0.019290109 | Up   | 0.000223196 | Fcgrt         |
| 94284       | 3302 | 731.1180835 | 2043.73031  | 1.48302849  | 0.002253259 | Up   | 1.46E-06    | Ugt1a6a       |
| 16172       | 3970 | 111.6049096 | 309.9600979 | 1.473682011 | 0.009509372 | Up   | 2.12E-05    | Il17ra        |
| 269823      | 1784 | 101.4806728 | 281.8365867 | 1.473653918 | 0.019279748 | Up   | 0.000203627 | Pon3          |
| 18600       | 4758 | 84.27135662 | 233.7929281 | 1.472117036 | 0.01877924  | Up   | 0.000184381 | Padl2         |
| 74144       | 3870 | 46.08432831 | 127.6225151 | 1.469534742 | 0.036089169 | Up   | 0.001274175 | Robo4         |
| 56620       | 1225 | 16.95814842 | 46.93182804 | 1.468587999 | 0.041958813 | Up   | 0.00174644  | Clec4n        |
| 268595      | 5806 | 45.79723329 | 126.7230567 | 1.468346691 | 0.023299274 | Up   | 0.000427878 | D430019H16Rik |
| 67016       | 5951 | 127.0630266 | 350.4150773 | 1.463520561 | 0.023190164 | Up   | 0.000410879 | Tbc1d2b       |
| 77889       | 3068 | 68.61985257 | 188.9793275 | 1.461530495 | 0.03619705  | Up   | 0.001290467 | Lbh           |
| 13110       | 3595 | 17.26943184 | 47.52826347 | 1.460565072 | 0.04728735  | Up   | 0.002244191 | Cyp2j6        |
| 19735       | 3009 | 158.3930284 | 435.6299538 | 1.45959432  | 0.019290109 | Up   | 0.000212932 | Rgs2          |
| 11670       | 1610 | 105.3581802 | 289.3082107 | 1.457304936 | 0.025687043 | Up   | 0.000569174 | Aldh3a1       |
| 26432       | 3670 | 155.2021084 | 426.0234946 | 1.456784838 | 0.01353896  | Up   | 5.41E-05    | Plod2         |
| 229900      | 5604 | 45.97463756 | 126.0726709 | 1.455345466 | 0.027754492 | Up   | 0.000668584 | Gbp7          |
| 67856       | 1812 | 45.73627743 | 125.285487  | 1.453808451 | 0.022929902 | Up   | 0.000372659 | Echdc3        |
| 104158      | 1966 | 429.5768518 | 1176.46999  | 1.45347636  | 0.007508887 | Up   | 1.52E-05    | Ces1d         |
| 13197       | 1224 | 36.19484534 | 99.03200563 | 1.452110606 | 0.022591026 | Up   | 0.000358379 | Gadd45a       |
| 1.01E+08    | 3691 | 25.39050641 | 69.41390176 | 1.450935456 | 0.040041696 | Up   | 0.001607053 | Gm17066       |
| 15567       | 2747 | 26.00789974 | 70.92860265 | 1.447417626 | 0.026681688 | Up   | 0.000613328 | Slc6a4        |
| 14205       | 1723 | 82.05559006 | 223.3347506 | 1.444534224 | 0.038150584 | Up   | 0.001437613 | Vegfd         |
| 232371      | 3010 | 46.9836076  | 127.7415111 | 1.442998023 | 0.028277921 | Up   | 0.000698499 | C1rl          |
| 216350      | 1418 | 47.84418071 | 130.0135798 | 1.442246954 | 0.034643284 | Up   | 0.001150763 | Tspan8        |
| 13447       | 5068 | 73.37963916 | 198.8821796 | 1.438462297 | 0.025490008 | Up   | 0.000547777 | Doc2b         |
| 83925       | 9791 | 40.19314432 | 108.5727849 | 1.433641169 | 0.040214884 | Up   | 0.001624406 | Trps1         |
| 16543       | 3435 | 39.23618039 | 105.8549727 | 1.431832535 | 0.034354593 | Up   | 0.00113296  | Mdfic         |
| 11676       | 2681 | 103.2762227 | 278.2715012 | 1.429985024 | 0.020472888 | Up   | 0.000266595 | Aldoc         |
| 228802      | 1637 | 106.083117  | 285.1772648 | 1.426663899 | 0.019290109 | Up   | 0.000209325 | Bpifb5        |
| 213603      | 9477 | 206.5472571 | 554.9768581 | 1.425955712 | 0.019270576 | Up   | 0.000202545 | Slc44a3       |
| 54445       | 2293 | 80.25285702 | 215.1728714 | 1.422871538 | 0.019656249 | Up   | 0.000235567 | Unc93b1       |
| 20317       | 1497 | 91.14163396 | 244.0474905 | 1.420979777 | 0.01353896  | Up   | 5.64E-05    | Serpinf1      |
| 16859       | 1495 | 50.18870535 | 134.1455568 | 1.418364633 | 0.027065987 | Up   | 0.000630066 | Lgals9        |
| 93706       | 4687 | 189.7320228 | 506.459259  | 1.416483023 | 0.019290109 | Up   | 0.000222924 | Pcdhgc3       |
| 16177       | 4806 | 214.7912772 | 572.9888153 | 1.415571572 | 0.01609485  | Up   | 9.24E-05    | Il1r1         |
| 102857      | 3977 | 101.098429  | 267.6740854 | 1.404716894 | 0.017847561 | Up   | 0.00013849  | Slc6a8        |
| 20887       | 1424 | 70.92338103 | 187.7111255 | 1.404180942 | 0.019715351 | Up   | 0.000237125 | Sult1a1       |
| 16835       | 4549 | 98.77788497 | 261.2647303 | 1.403252396 | 0.019290109 | Up   | 0.000226189 | Ldlr          |
| 56473       | 1508 | 1267.791506 | 3352.056334 | 1.402728888 | 0.004898185 | Up   | 7.11E-06    | Fads2         |
| 57764       | 2411 | 132.0085125 | 348.8109075 | 1.401814191 | 0.01353896  | Up   | 5.17E-05    | Ntn4          |
| 67416       | 3649 | 118.468556  | 312.8894978 | 1.401149046 | 0.016828865 | Up   | 0.000120325 | Armcx2        |
| 16590       | 5194 | 420.6647415 | 1108.64289  | 1.39805192  | 0.011387464 | Up   | 2.94E-05    | Kit           |
| 227545      | 3522 | 41.82913007 | 110.1353574 | 1.396697801 | 0.026336061 | Up   | 0.000597179 | Proser2       |
| 19672       | 3063 | 113.6449033 | 299.1287695 | 1.396233688 | 0.019171768 | Up   | 0.000195116 | Rcn1          |
| 20442       | 5772 | 107.4030947 | 282.5998001 | 1.395724881 | 0.01874945  | Up   | 0.000182669 | St3gal1       |
| 71982       | 2482 | 105.1751472 | 276.4817892 | 1.394390622 | 0.019171768 | Up   | 0.000191844 | Snx10         |
| 12978       | 3875 | 216.4651663 | 568.6279878 | 1.393350226 | 0.017396555 | Up   | 0.000128991 | Csf1r         |
| 97998       | 8427 | 116.0309887 | 304.4681572 | 1.39178119  | 0.020231823 | Up   | 0.000255547 | Deptor        |
| 22051       | 1760 | 80.72243225 | 211.7616061 | 1.391399492 | 0.022968444 | Up   | 0.000391812 | Trip6         |
| 434130      | 2058 | 73.96441719 | 194.0152222 | 1.391266558 | 0.024683086 | Up   | 0.000516071 | Ccdc8         |
| 56185       | 2147 | 107.7111918 | 282.446581  | 1.390809875 | 0.022968444 | Up   | 0.000397016 | Hao2          |
| 20536       | 6301 | 314.4251621 | 823.8185678 | 1.389609968 | 0.005086182 | Up   | 7.89E-06    | Slc4a3        |
| 19215       | 889  | 4049.802284 | 10581.69444 | 1.385647283 | 0.00488696  | Up   | 5.05E-06    | Ptgsd         |
| 56188       | 573  | 263.9179975 | 689.4790707 | 1.385417023 | 0.01353896  | Up   | 4.49E-05    | Fxyd1         |
| 18595       | 6555 | 283.8364096 | 741.1986355 | 1.38480056  | 0.01353896  | Up   | 5.24E-05    | Pdgfra        |
| 74551       | 3400 | 60.69179935 | 158.014388  | 1.380482431 | 0.036102861 | Up   | 0.001277864 | Pck2          |
| 104079      | 2093 | 54.66189976 | 142.2364843 | 1.379684063 | 0.024005571 | Up   | 0.000482019 | Nxph3         |
| 208177      | 5407 | 56.35097536 | 146.5574624 | 1.378953942 | 0.020012906 | Up   | 0.00024714  | Phldb2        |
| 72575       | 2976 | 33.81912125 | 87.78055756 | 1.37606226  | 0.024005571 | Up   | 0.000474283 | C430049B03Rik |
| BGI_novel_1 | 1885 | 28.68896925 | 74.45109205 | 1.375796875 | 0.049620513 | Up   | 0.002467632 | NA            |
| 319613      | 2390 | 33.95450988 | 87.85943756 | 1.371594056 | 0.037982446 | Up   | 0.001418981 | Sybu          |
| 21886       | 2958 | 118.0982119 | 305.2952151 | 1.370217857 | 0.017930932 | Up   | 0.000154474 | Tle2          |
| 13132       | 4248 | 112.5270845 | 290.7151033 | 1.369333734 | 0.017930932 | Up   | 0.000157625 | Dab2          |

|             |       |             |             |             |             |    |             |               |
|-------------|-------|-------------|-------------|-------------|-------------|----|-------------|---------------|
| 13641       | 3375  | 219.1174753 | 566.0658352 | 1.369265304 | 0.01353896  | Up | 4.48E-05    | Efnb1         |
| 11898       | 1630  | 881.7775755 | 2276.900841 | 1.36858477  | 0.0116458   | Up | 3.11E-05    | Ass1          |
| 53623       | 4335  | 28.53135731 | 73.65482727 | 1.3682317   | 0.045606723 | Up | 0.002085991 | Gria3         |
| 64292       | 3647  | 59.88553045 | 154.4585843 | 1.366940688 | 0.031567216 | Up | 0.00092561  | Ptges         |
| 67426       | 4026  | 263.1043558 | 678.3555426 | 1.36640649  | 0.009509372 | Up | 2.13E-05    | Adck3         |
| 16525       | 2222  | 63.80687051 | 164.4989132 | 1.366294371 | 0.023594022 | Up | 0.000443605 | Kcnk1         |
| 236285      | 3920  | 42.6143091  | 109.7893706 | 1.365328537 | 0.022660039 | Up | 0.000364366 | Lanc13        |
| 226250      | 3915  | 23.499823   | 60.41803577 | 1.362329391 | 0.026196607 | Up | 0.000588371 | Afap112       |
| 11761       | 4693  | 189.4543317 | 487.0432893 | 1.362199881 | 0.01390321  | Up | 6.69E-05    | Aox1          |
| 244954      | 2525  | 231.7556015 | 594.2313593 | 1.358420533 | 0.019312244 | Up | 0.000229779 | Prss35        |
| 14594       | 3575  | 47.15602906 | 120.831801  | 1.357486057 | 0.037807442 | Up | 0.001403294 | Ggta1         |
| 52815       | 2458  | 125.175551  | 320.5680898 | 1.356678018 | 0.025656899 | Up | 0.00055634  | Ldhd          |
| 67448       | 6963  | 89.56616608 | 229.1722517 | 1.355406615 | 0.018354384 | Up | 0.000168534 | Plxdc2        |
| 17380       | 6056  | 229.6536989 | 587.4522866 | 1.355011659 | 0.015528962 | Up | 8.70E-05    | Mme           |
| 17476       | 4384  | 362.8378656 | 928.124717  | 1.354993658 | 0.018393264 | Up | 0.000172202 | Mpeg1         |
| 16423       | 3918  | 197.0162447 | 503.277461  | 1.353039399 | 0.023044425 | Up | 0.00040333  | Cd47          |
| 68957       | 1489  | 48.50262883 | 123.8832178 | 1.352845914 | 0.024918561 | Up | 0.00052604  | Paqr6         |
| 12050       | 3476  | 221.7137876 | 565.8867891 | 1.351814968 | 0.002216096 | Up | 1.34E-06    | Bcl2l2        |
| 11568       | 4073  | 126.2201873 | 322.1025169 | 1.351577265 | 0.017959615 | Up | 0.000163953 | Aebp1         |
| 208748      | 5955  | 112.058938  | 285.8191056 | 1.350844632 | 0.028570326 | Up | 0.000708727 | Prrg3         |
| 106522      | 2454  | 473.085035  | 1203.764821 | 1.34738213  | 0.012821383 | Up | 3.70E-05    | Pkdcc         |
| 18186       | 5921  | 103.9270982 | 264.3695757 | 1.346984282 | 0.024480702 | Up | 0.000494954 | Nrp1          |
| 78388       | 2810  | 116.4125486 | 296.1181881 | 1.346926525 | 0.020677778 | Up | 0.000280135 | Mvp           |
| 14726       | 1839  | 46.48267027 | 118.1076363 | 1.345337392 | 0.031567216 | Up | 0.000928087 | Pdpn          |
| 14858       | 901   | 226.063404  | 573.5570175 | 1.34320945  | 0.019171768 | Up | 0.000199181 | Gsta2         |
| 20963       | 5144  | 50.36169705 | 127.5615572 | 1.34079481  | 0.035258064 | Up | 0.001201541 | Syk           |
| 18826       | 3802  | 74.10903895 | 187.5752217 | 1.339747842 | 0.034948782 | Up | 0.001174365 | Lcp1          |
| 27273       | 3453  | 42.51730422 | 107.6001778 | 1.33955843  | 0.024683086 | Up | 0.000514379 | Pdk4          |
| 57816       | 942   | 53.67629891 | 135.7365356 | 1.338451994 | 0.039195312 | Up | 0.001538681 | Tesc          |
| 16001       | 11978 | 369.5374218 | 933.1776143 | 1.336431231 | 0.004898185 | Up | 6.36E-06    | Igf1r         |
| 18552       | 6370  | 40.48077044 | 102.0145927 | 1.333466885 | 0.028101949 | Up | 0.00068899  | Pcsk5         |
| 20851       | 4953  | 85.38956352 | 214.8604101 | 1.331268021 | 0.01977571  | Up | 0.000238703 | Stat5b        |
| 21834       | 5992  | 43.9249821  | 110.42727   | 1.329982886 | 0.038827993 | Up | 0.001485934 | Thrb          |
| 67749       | 1280  | 399.0518508 | 1002.400021 | 1.32881023  | 0.014039847 | Up | 7.02E-05    | Mgarp         |
| 16002       | 3256  | 349.404877  | 876.9226588 | 1.327549862 | 0.01353896  | Up | 4.84E-05    | Igf2          |
| 71703       | 3441  | 97.76494072 | 244.7261642 | 1.32377925  | 0.029462304 | Up | 0.000767613 | Armcx3        |
| 15108       | 938   | 113.9752809 | 285.2595033 | 1.323553985 | 0.019290109 | Up | 0.000219688 | Hsd17b10      |
| 11489       | 7675  | 36.60345351 | 91.5603849  | 1.322743756 | 0.029160719 | Up | 0.000752997 | Adam12        |
| 110639      | 3710  | 95.87256048 | 239.6516378 | 1.321748931 | 0.017775479 | Up | 0.000134496 | Prps2         |
| 18104       | 1552  | 41.05471815 | 102.5792338 | 1.321118765 | 0.044209219 | Up | 0.001929361 | Nqo1          |
| 214239      | 4716  | 41.81269831 | 104.337151  | 1.319239892 | 0.031847095 | Up | 0.000940435 | A430105119Rik |
| 212980      | 3302  | 162.6442012 | 404.9584384 | 1.316054463 | 0.016828865 | Up | 0.000119584 | Slc45a3       |
| 66277       | 2294  | 123.7776    | 308.081196  | 1.315560375 | 0.01353896  | Up | 4.51E-05    | Klf15         |
| 67564       | 1979  | 367.2890737 | 914.1018891 | 1.315439004 | 0.017930932 | Up | 0.000151938 | Tmem35        |
| 12257       | 871   | 89.10810718 | 221.2599221 | 1.312113551 | 0.026176589 | Up | 0.000586793 | Tspo          |
| BGI_novel_1 | 610   | 36.35907234 | 90.24710928 | 1.31156533  | 0.007512489 | Up | 1.55E-05    | NA            |
| 68180       | 861   | 29.1780867  | 72.30943618 | 1.309298643 | 0.033385695 | Up | 0.001058832 | Hyi           |
| 214642      | 4898  | 108.2190294 | 267.7913819 | 1.307155326 | 0.019171768 | Up | 0.00019691  | Cped1         |
| 13491       | 1366  | 97.00144695 | 239.881851  | 1.306245837 | 0.007508887 | Up | 1.51E-05    | Drd4          |
| 56738       | 2647  | 68.73904434 | 169.856204  | 1.305112214 | 0.020958655 | Up | 0.00029635  | Mocs1         |
| 16367       | 9163  | 54.57513053 | 134.7938689 | 1.304439296 | 0.038951188 | Up | 0.001510191 | Irs1          |
| 67776       | 4153  | 114.0806984 | 281.5416141 | 1.303293461 | 0.018393264 | Up | 0.000171931 | Vwa5a         |
| 268977      | 4326  | 253.4124993 | 623.4136925 | 1.298702157 | 0.016232431 | Up | 0.000100766 | Ltbp1         |
| 226527      | 1289  | 54.91969436 | 134.9068338 | 1.296567929 | 0.033348188 | Up | 0.001048873 | BC026585      |
| 12262       | 1063  | 138.5800584 | 340.1791204 | 1.295574924 | 0.031510965 | Up | 0.000903719 | C1qc          |
| 215627      | 4029  | 57.73459113 | 140.9506783 | 1.28768256  | 0.023594022 | Up | 0.000444636 | Zbtb8b        |
| 21912       | 1791  | 40.50174597 | 98.6672016  | 1.28458649  | 0.023191052 | Up | 0.000422104 | Tspan7        |
| 77037       | 992   | 67.96445856 | 165.3982544 | 1.283091605 | 0.045265471 | Up | 0.002055658 | Mrap          |
| 195727      | 5319  | 26.71938714 | 64.96790648 | 1.281840299 | 0.036655975 | Up | 0.001327371 | Nhs           |
| 12977       | 3923  | 104.8733174 | 254.957333  | 1.281608168 | 0.027587111 | Up | 0.000651048 | Csf1          |
| 72844       | 1892  | 68.83770188 | 167.1892309 | 1.280211083 | 0.020147007 | Up | 0.00025187  | Kctd17        |
| 15976       | 1412  | 100.0626193 | 242.9953507 | 1.280025589 | 0.022968444 | Up | 0.000395885 | Ifnar2        |
| 234878      | 5692  | 234.1827052 | 568.6733207 | 1.279965588 | 0.007151595 | Up | 1.35E-05    | BC021891      |
| 382014      | 3773  | 26.79653869 | 65.06481363 | 1.2798309   | 0.046665434 | Up | 0.002186719 | Ano8          |
| 18214       | 8447  | 121.9368817 | 296.0394298 | 1.279654786 | 0.020313741 | Up | 0.00026096  | Ddr2          |
| 56758       | 5109  | 386.9141282 | 937.8631596 | 1.27736403  | 0.01390321  | Up | 6.64E-05    | Mbnl1         |
| 56745       | 4356  | 52.21310087 | 126.3924548 | 1.275426596 | 0.049017662 | Up | 0.002397435 | C1qtnf1       |
| 18295       | 2540  | 183.742719  | 444.4864116 | 1.274452232 | 0.01353896  | Up | 5.13E-05    | Ogn           |
| 320634      | 5164  | 172.1524699 | 416.3420599 | 1.274082431 | 0.010206271 | Up | 2.42E-05    | Ocrl          |
| 217353      | 2798  | 122.5316879 | 296.3215632 | 1.274008721 | 0.011641771 | Up | 3.06E-05    | Tmc6          |
| 328035      | 1257  | 63.60131765 | 153.6899566 | 1.27289433  | 0.022968444 | Up | 0.000385579 | Fads6         |
| 12609       | 1921  | 59.13794568 | 142.8631152 | 1.272477452 | 0.04948401  | Up | 0.002442293 | Cebpnd        |
| 78558       | 2690  | 234.9356066 | 567.2925469 | 1.271827527 | 0.01326225  | Up | 3.94E-05    | Htra3         |
| 22166       | 1051  | 199.4123449 | 481.3126269 | 1.271219548 | 0.023594022 | Up | 0.000440706 | Txn1          |
| 215201      | 2789  | 83.51746969 | 201.5066776 | 1.270677739 | 0.019290109 | Up | 0.000207079 | Trmt2b        |
| 13405       | 4709  | 176.1426937 | 424.6484959 | 1.269524506 | 0.017930932 | Up | 0.000157689 | Dmd           |
| 80287       | 2360  | 47.77774597 | 115.1828348 | 1.269515037 | 0.035385188 | Up | 0.00121576  | Apobec3       |
| 20698       | 1793  | 43.06629557 | 103.7694495 | 1.268750628 | 0.033843391 | Up | 0.001100052 | Sphk1         |
| 12520       | 1534  | 805.0633624 | 1937.192713 | 1.266793241 | 0.015528962 | Up | 8.57E-05    | Cd81          |
| 26423       | 2948  | 612.0811813 | 1472.157211 | 1.266136827 | 0.016828865 | Up | 0.000120429 | Nr5a1         |
| 14127       | 683   | 41.21693145 | 99.07095006 | 1.265224985 | 0.039546979 | Up | 0.001575965 | Fcer1g        |

|        |      |             |             |             |             |    |             |          |
|--------|------|-------------|-------------|-------------|-------------|----|-------------|----------|
| 50909  | 2762 | 203.1887422 | 488.1674192 | 1.26455554  | 0.032438848 | Up | 0.000973576 | C1ra     |
| 74754  | 4028 | 900.4713316 | 2163.189223 | 1.264407618 | 0.016630592 | Up | 0.000105389 | Dhcr24   |
| 192166 | 4573 | 168.2900581 | 404.0986507 | 1.263757584 | 0.019290109 | Up | 0.000225537 | Sardh    |
| 13014  | 620  | 132.8327776 | 318.8555834 | 1.263291957 | 0.038375491 | Up | 0.001460206 | Cstb     |
| 329934 | 2528 | 59.14128414 | 141.6491221 | 1.260084186 | 0.01390321  | Up | 6.27E-05    | Foxo6    |
| 50794  | 6396 | 154.7465316 | 370.4781266 | 1.259481293 | 0.017775479 | Up | 0.000134863 | Klf13    |
| 12259  | 1082 | 138.6871349 | 331.937371  | 1.259077099 | 0.028596161 | Up | 0.000718561 | C1qa     |
| 50500  | 3145 | 87.80451256 | 209.865559  | 1.257098434 | 0.027754492 | Up | 0.000667764 | Ttpa     |
| 50766  | 5995 | 91.31026452 | 218.1189577 | 1.256266213 | 0.021442047 | Up | 0.000314509 | Crim1    |
| 11363  | 1948 | 359.2236059 | 857.9498296 | 1.256011128 | 0.017243156 | Up | 0.00012711  | Acadl    |
| 20907  | 3188 | 120.700465  | 288.257025  | 1.255924534 | 0.021041371 | Up | 0.00030377  | Stx1a    |
| 11532  | 1604 | 380.1258422 | 907.5992499 | 1.255578309 | 0.01390321  | Up | 6.53E-05    | Adh5     |
| 209047 | 1024 | 34.42553939 | 82.09237949 | 1.253769046 | 0.037279504 | Up | 0.00136915  | Gipc3    |
| 242377 | 5578 | 94.79597059 | 225.9474722 | 1.253089775 | 0.025157319 | Up | 0.000539    | Pm20d2   |
| 77446  | 9762 | 759.8866906 | 1810.68945  | 1.252682918 | 0.017959615 | Up | 0.000163186 | Heg1     |
| 211286 | 2447 | 105.3486478 | 251.0203374 | 1.252632458 | 0.026243911 | Up | 0.00059107  | Cln5     |
| 624549 | 1902 | 28.55097498 | 67.98099643 | 1.251591496 | 0.03368057  | Up | 0.001078789 | Gm29683  |
| 13649  | 5134 | 72.4546034  | 172.4514963 | 1.251041387 | 0.031525816 | Up | 0.000906484 | Egfr     |
| 18442  | 2943 | 51.31744478 | 122.0623419 | 1.250096934 | 0.036245167 | Up | 0.001293745 | P2ry2    |
| 14183  | 5222 | 99.44158027 | 236.5032109 | 1.249938642 | 0.037248816 | Up | 0.001364896 | Ggfr2    |
| 17117  | 2575 | 106.4988175 | 253.0813949 | 1.24876404  | 0.024994765 | Up | 0.000530228 | Amacr    |
| 228911 | 5139 | 207.032178  | 491.823029  | 1.248284273 | 0.015528962 | Up | 8.70E-05    | Tshz2    |
| 16403  | 6002 | 286.8320532 | 680.8376573 | 1.247104582 | 0.009509372 | Up | 2.02E-05    | Itga6    |
| 18550  | 4277 | 393.6244504 | 933.3156433 | 1.245545239 | 0.016828865 | Up | 0.000113536 | Furin    |
| 52377  | 1448 | 92.46118399 | 219.1643895 | 1.245093662 | 0.032792895 | Up | 0.000998875 | Rcn3     |
| 76238  | 1281 | 145.3987921 | 344.6292679 | 1.245029944 | 0.029640645 | Up | 0.000777129 | Ghrpr    |
| 30794  | 1189 | 56.65109498 | 134.192395  | 1.244127167 | 0.043651079 | Up | 0.001877992 | Pdlim4   |
| 11867  | 1555 | 543.4384976 | 1286.864269 | 1.243671218 | 0.014400365 | Up | 7.61E-05    | Arpc1b   |
| 264895 | 3514 | 312.4331994 | 739.7287682 | 1.24344862  | 0.017901091 | Up | 0.000143536 | Acsf2    |
| 208647 | 3318 | 71.15041582 | 168.108497  | 1.240448554 | 0.040214884 | Up | 0.001623212 | Creb3l2  |
| 241447 | 6944 | 183.8791043 | 434.3857908 | 1.240219368 | 0.021108426 | Up | 0.000308478 | Cers6    |
| 29811  | 2113 | 346.8354508 | 816.3087996 | 1.234863642 | 0.019171768 | Up | 0.000196034 | Ndrp2    |
| 213019 | 1587 | 67.22892444 | 158.1318997 | 1.233974456 | 0.042025777 | Up | 0.001753716 | Pdlim2   |
| 13982  | 6238 | 119.8627629 | 281.8879934 | 1.233738496 | 0.033843391 | Up | 0.001097432 | Esr1     |
| 217333 | 2193 | 166.6385183 | 391.7764924 | 1.233308918 | 0.007508887 | Up | 1.50E-05    | Trim47   |
| 67103  | 2104 | 311.9280732 | 733.30216   | 1.23319439  | 0.014400365 | Up | 7.56E-05    | Ptgr1    |
| 16803  | 2528 | 138.82454   | 326.2695618 | 1.232801787 | 0.032438848 | Up | 0.00097469  | Lbp      |
| 66142  | 1115 | 73.16011415 | 171.89935   | 1.232434858 | 0.03367925  | Up | 0.001077295 | Cox7b    |
| 14284  | 5886 | 92.94293816 | 218.2046718 | 1.231264833 | 0.031567216 | Up | 0.000910575 | Fosl2    |
| 11796  | 2820 | 76.60418665 | 179.8247935 | 1.2310968   | 0.037982446 | Up | 0.001420091 | Birc3    |
| 21881  | 3242 | 488.3226471 | 1145.542885 | 1.230124876 | 0.018487666 | Up | 0.000175337 | Tkt      |
| 58805  | 3615 | 197.6092941 | 463.5262693 | 1.2300003   | 0.016962369 | Up | 0.00012247  | Mlxipl   |
| 69608  | 3881 | 95.44538661 | 223.8157808 | 1.229564391 | 0.031567216 | Up | 0.000912326 | Sec2d4   |
| 73251  | 7356 | 110.9308644 | 259.9958922 | 1.228828007 | 0.029356969 | Up | 0.000763127 | Setd7    |
| 52120  | 2679 | 387.0741629 | 906.8349239 | 1.228229942 | 0.016446953 | Up | 0.000102862 | Hgsnat   |
| 11669  | 2666 | 2087.15126  | 4884.726556 | 1.226742644 | 0.01609485  | Up | 9.75E-05    | Aldh2    |
| 212943 | 5461 | 37.07507656 | 86.69887023 | 1.225563522 | 0.044209219 | Up | 0.001925073 | Fam46a   |
| 244152 | 2597 | 148.1001429 | 346.0853413 | 1.224554804 | 0.017903692 | Up | 0.000146508 | Tsku     |
| 13723  | 2622 | 178.521508  | 417.0998311 | 1.22429483  | 0.041416086 | Up | 0.001701927 | Emb      |
| 18034  | 3078 | 74.65584623 | 174.1095756 | 1.221668404 | 0.049557727 | Up | 0.002456771 | Nfkb2    |
| 27410  | 6486 | 275.8319044 | 642.7469724 | 1.220461572 | 0.01353896  | Up | 4.71E-05    | Abca3    |
| 13171  | 3292 | 123.6334808 | 287.8551503 | 1.219273538 | 0.023594022 | Up | 0.000446514 | Dbt      |
| 53945  | 3380 | 65.10277483 | 151.5736528 | 1.219228059 | 0.031510965 | Up | 0.000902708 | Slc40a1  |
| 16880  | 9372 | 624.1445111 | 1452.126998 | 1.218215625 | 0.017959615 | Up | 0.000161112 | Lifr     |
| 50782  | 3137 | 111.554217  | 259.4912518 | 1.21794085  | 0.032960598 | Up | 0.001020449 | Rgs11    |
| 69574  | 1069 | 92.28442703 | 214.6176135 | 1.217609363 | 0.046306948 | Up | 0.002149693 | Cmb1     |
| 74777  | 3461 | 51.78897032 | 120.4234219 | 1.217399238 | 0.04008404  | Up | 0.001615665 | Sepn1    |
| 15212  | 1922 | 121.604709  | 282.335889  | 1.215213432 | 0.023279242 | Up | 0.000426507 | Hexb     |
| 19206  | 7322 | 248.6623939 | 576.828332  | 1.213953687 | 0.020677778 | Up | 0.000281682 | Ptch1    |
| 78267  | 3085 | 182.7904114 | 423.5095214 | 1.212204012 | 0.004898185 | Up | 6.82E-06    | Klhdc8b  |
| 19165  | 2017 | 73.47096255 | 170.178847  | 1.211805642 | 0.037648841 | Up | 0.001389292 | Psen2    |
| 12514  | 1248 | 44.85252516 | 103.8475969 | 1.211206717 | 0.034643284 | Up | 0.001151441 | Cd68     |
| 21858  | 3635 | 3350.413643 | 7746.931218 | 1.209285708 | 0.010755278 | Up | 2.64E-05    | Timp2    |
| 67759  | 896  | 39.21373923 | 90.66515431 | 1.209188964 | 0.038652298 | Up | 0.001472976 | Plgrkt   |
| 93692  | 1335 | 63.55173018 | 146.7859959 | 1.207711027 | 0.049017662 | Up | 0.002403729 | GlrX     |
| 235293 | 2895 | 305.9397718 | 706.4174825 | 1.20727338  | 0.018640709 | Up | 0.000178632 | Sc5d     |
| 20415  | 2423 | 245.8696053 | 566.867599  | 1.205118412 | 0.01353896  | Up | 5.70E-05    | Shbg     |
| 268591 | 2162 | 1373.948206 | 3165.79354  | 1.204239553 | 0.017851899 | Up | 0.000142372 | Serpina5 |
| 28193  | 5474 | 146.109447  | 336.466937  | 1.203415284 | 0.035756734 | Up | 0.001243992 | Reep3    |
| 269951 | 1718 | 103.5116215 | 238.2641899 | 1.202769385 | 0.036140693 | Up | 0.001284706 | Idh2     |
| 22418  | 4187 | 55.05958534 | 126.6986036 | 1.202334974 | 0.02898412  | Up | 0.000747187 | Wnt5a    |
| 14309  | 1669 | 31.30986267 | 72.04584828 | 1.202298115 | 0.038813195 | Up | 0.001480781 | Fshr     |
| 208795 | 3239 | 65.30547878 | 150.2234805 | 1.201834393 | 0.045051945 | Up | 0.002017889 | Tmem63a  |
| 20776  | 2437 | 42.20857288 | 97.08591481 | 1.201725954 | 0.041416086 | Up | 0.00170342  | Tmie     |
| 101744 | 1923 | 56.55727652 | 129.9942606 | 1.200663373 | 0.021898165 | Up | 0.000335208 | Acp7     |
| 27081  | 6131 | 290.7198548 | 668.0140704 | 1.200248886 | 0.01390321  | Up | 6.83E-05    | Zfp275   |
| 12946  | 1674 | 88.56964394 | 203.4792259 | 1.199997287 | 0.027623379 | Up | 0.000659713 | Cr1l     |
| 11886  | 2264 | 423.3364794 | 972.5042076 | 1.199899679 | 0.022968444 | Up | 0.000387166 | Asah1    |
| 66375  | 1318 | 242.6057039 | 557.2871114 | 1.199807318 | 0.020472888 | Up | 0.00026804  | Dhrs7    |
| 22700  | 4079 | 34.49106884 | 79.1815022  | 1.198940601 | 0.022935054 | Up | 0.000377168 | Zfp40    |
| 21937  | 2186 | 344.0671113 | 789.1695872 | 1.197645365 | 0.020836508 | Up | 0.000291928 | Tnfrsf1a |

|             |       |             |             |             |             |    |             |               |
|-------------|-------|-------------|-------------|-------------|-------------|----|-------------|---------------|
| 67391       | 3261  | 73.68796475 | 168.7142995 | 1.195081343 | 0.035605657 | Up | 0.001232298 | Fundc2        |
| 11747       | 1738  | 220.218561  | 503.9027332 | 1.194209211 | 0.023372006 | Up | 0.000430221 | Anxa5         |
| 27280       | 1483  | 49.59510529 | 113.4583118 | 1.193892655 | 0.042362546 | Up | 0.001780553 | Phlda3        |
| 11749       | 2653  | 174.978213  | 399.9657641 | 1.192701216 | 0.025687043 | Up | 0.000563492 | Anxa6         |
| 50908       | 2914  | 258.6646756 | 590.3929187 | 1.190592371 | 0.031567216 | Up | 0.000927443 | C1s1          |
| 319876      | 5044  | 155.5957596 | 354.5591237 | 1.188223478 | 0.014966447 | Up | 8.06E-05    | Cobl11        |
| 14867       | 1114  | 473.1081643 | 1076.854634 | 1.186581549 | 0.01390321  | Up | 6.74E-05    | Gstm6         |
| 66222       | 1931  | 74.11386678 | 168.5480974 | 1.185344939 | 0.047776289 | Up | 0.002298501 | Serpinb1a     |
| 16792       | 2402  | 99.97528915 | 227.3220301 | 1.185094051 | 0.045265471 | Up | 0.002056723 | Laptm5        |
| 11722       | 1761  | 401.2833309 | 911.9024987 | 1.18425835  | 0.030884535 | Up | 0.00087003  | Amy1          |
| 15360       | 3294  | 1781.609044 | 4047.98537  | 1.184023289 | 0.017959615 | Up | 0.000164135 | Hmgcs2        |
| 66826       | 2135  | 135.2768977 | 307.2303043 | 1.183405047 | 0.018442854 | Up | 0.000174117 | Taz           |
| 73132       | 3141  | 114.0354356 | 258.6834656 | 1.181705644 | 0.024658689 | Up | 0.000506683 | Slc25a16      |
| 109934      | 5160  | 355.6649947 | 805.8542672 | 1.179999973 | 0.019171768 | Up | 0.000198485 | Abr           |
| 110954      | 798   | 666.9040739 | 1509.782951 | 1.178789993 | 0.021898165 | Up | 0.000330684 | Rpl10         |
| 14275       | 1116  | 258.9886099 | 586.0056536 | 1.178025933 | 0.017930932 | Up | 0.000151907 | Folr1         |
| 73737       | 674   | 250.4365354 | 566.6080826 | 1.177906134 | 0.020836508 | Up | 0.000291558 | 1110008P14Rik |
| 66889       | 2761  | 86.31372246 | 195.2275708 | 1.177494963 | 0.01353896  | Up | 5.15E-05    | Rnf128        |
| 246228      | 3140  | 155.448818  | 351.3328151 | 1.176398686 | 0.020472888 | Up | 0.000266241 | Vwa1          |
| 50915       | 1768  | 51.50990336 | 116.2711664 | 1.174571635 | 0.042333329 | Up | 0.0017775   | Grb14         |
| BGI_novel_1 | 15033 | 212.1851709 | 478.8672536 | 1.174301949 | 5.80E-05    | Up | 1.50E-08    | NA            |
| 104099      | 7001  | 114.4734807 | 258.3295066 | 1.174199021 | 0.033951002 | Up | 0.001106969 | Itga9         |
| 20430       | 6470  | 327.9254447 | 739.8992792 | 1.173961044 | 0.019270576 | Up | 0.0002027   | Cyfp1         |
| 11364       | 2062  | 340.7007603 | 768.1458524 | 1.172875103 | 0.022935054 | Up | 0.000377329 | Acadm         |
| 105859      | 2507  | 141.9178108 | 319.7168202 | 1.171739886 | 0.036102861 | Up | 0.00127911  | Csdc2         |
| 83704       | 3315  | 74.2608828  | 167.2924777 | 1.171698205 | 0.024658689 | Up | 0.000507372 | Slc12a9       |
| 70152       | 1883  | 100.2884722 | 225.8947492 | 1.171494953 | 0.045107523 | Up | 0.002036511 | Mettl7a1      |
| 19285       | 3218  | 265.1324923 | 597.1619622 | 1.171408787 | 0.028636595 | Up | 0.000722162 | Ptrf          |
| 23947       | 5916  | 63.75484649 | 143.536045  | 1.170806153 | 0.038150584 | Up | 0.001439772 | Mid2          |
| 236920      | 5003  | 242.2043149 | 544.9847503 | 1.169991294 | 0.019312244 | Up | 0.00022932  | Stard8        |
| 72018       | 2964  | 63.86111685 | 143.6500723 | 1.16954903  | 0.034772702 | Up | 0.001166102 | Fundc1        |
| 23849       | 4217  | 162.3212029 | 365.0760141 | 1.169345424 | 0.021041371 | Up | 0.000301241 | Klf6          |
| 67916       | 3162  | 403.6260954 | 907.5765358 | 1.168999986 | 0.025675952 | Up | 0.000558374 | Pfpp3         |
| 13360       | 2858  | 325.0377926 | 730.8661932 | 1.168999983 | 0.023618559 | Up | 0.000447996 | Dhcr7         |
| 225849      | 2708  | 79.3179682  | 178.3507333 | 1.16899752  | 0.028647059 | Up | 0.000723882 | Ppp2r5b       |
| 16971       | 14907 | 1372.039424 | 3083.834085 | 1.168403212 | 0.01390321  | Up | 6.28E-05    | Lrp1          |
| 225845      | 3523  | 66.99532004 | 150.5779311 | 1.168378117 | 0.047431598 | Up | 0.002272357 | Pl2g16        |
| 15931       | 4988  | 145.6914209 | 327.4449393 | 1.168336409 | 0.02286149  | Up | 0.000370562 | Ids           |
| 23972       | 3466  | 85.38063768 | 191.598862  | 1.166108149 | 0.024658689 | Up | 0.000504575 | Papss2        |
| 210789      | 6641  | 176.9881419 | 397.105818  | 1.165870794 | 0.025687043 | Up | 0.000568457 | Tbc1d4        |
| 13177       | 1091  | 67.62302332 | 151.7211231 | 1.165835532 | 0.028570326 | Up | 0.000709424 | Eci1          |
| 319535      | 5944  | 34.62880139 | 77.66812541 | 1.165350193 | 0.047191071 | Up | 0.002233655 | Zfp182        |
| 1E+08       | 2772  | 152.8223956 | 342.701856  | 1.165098024 | 0.01353896  | Up | 5.36E-05    | Mir22hg       |
| 56700       | 1557  | 163.9145699 | 366.7856737 | 1.161993192 | 0.030635159 | Up | 0.000845217 | Glmp          |
| 94279       | 3228  | 56.82984495 | 127.153663  | 1.161852338 | 0.04728735  | Up | 0.002259206 | Sfxn2         |
| 18807       | 2308  | 1537.635006 | 3440.035079 | 1.161710191 | 0.01609485  | Up | 9.65E-05    | Pld3          |
| 55963       | 3926  | 28.84357754 | 64.50905704 | 1.161251612 | 0.04208212  | Up | 0.001757881 | Slc1a4        |
| 22381       | 1018  | 293.4507551 | 656.2213831 | 1.161064185 | 0.029978671 | Up | 0.000814181 | Wbp5          |
| BGI_novel_1 | 3003  | 64.57497779 | 144.3360219 | 1.16038425  | 0.023867335 | Up | 0.000456248 | NA            |
| 14860       | 970   | 587.1527184 | 1311.704647 | 1.159635207 | 0.016962369 | Up | 0.000123578 | Gsta4         |
| 77056       | 3353  | 92.87445178 | 207.4712286 | 1.159557588 | 0.022968444 | Up | 0.000381154 | Tmco4         |
| 18597       | 2872  | 137.0925449 | 306.0863842 | 1.158788751 | 0.027801278 | Up | 0.000674907 | Pdha1         |
| 320712      | 4562  | 47.66170983 | 106.4142492 | 1.158788731 | 0.042811427 | Up | 0.001823802 | Abi3bp        |
| 11428       | 4319  | 252.9972677 | 564.6618852 | 1.158265448 | 0.019171768 | Up | 0.000196167 | Aco1          |
| 12496       | 1937  | 53.02113153 | 118.1891943 | 1.156458776 | 0.024005571 | Up | 0.000474088 | Entpd2        |
| 243914      | 3444  | 62.21347726 | 138.6753567 | 1.156412387 | 0.022274541 | Up | 0.000346644 | Lgi4          |
| 54135       | 2162  | 415.1212456 | 925.1170925 | 1.15610321  | 0.023955121 | Up | 0.000468649 | Lsr           |
| 16425       | 3116  | 277.3348681 | 618.0455021 | 1.156084045 | 0.041416086 | Up | 0.001706618 | Itih2         |
| 19186       | 977   | 163.8183175 | 365.0419054 | 1.155965407 | 0.045107523 | Up | 0.002034754 | Psme1         |
| 67298       | 5584  | 595.2564513 | 1324.025003 | 1.15334711  | 0.010952372 | Up | 2.74E-05    | Gprasp1       |
| 68801       | 2820  | 987.826276  | 2195.977439 | 1.152533983 | 0.019290109 | Up | 0.000219758 | Elov15        |
| 54325       | 1826  | 71.91766523 | 159.7361628 | 1.151272872 | 0.033967887 | Up | 0.001111421 | Elov11        |
| 545622      | 6369  | 30.66066488 | 68.06996139 | 1.150629309 | 0.045691225 | Up | 0.002106092 | Ptpn3         |
| 170460      | 2500  | 105.5076597 | 234.1077048 | 1.149824676 | 0.032205644 | Up | 0.000961164 | Stard5        |
| 214424      | 2539  | 61.95773473 | 137.4501046 | 1.149551702 | 0.033356611 | Up | 0.001054549 | Parp16        |
| 12258       | 1837  | 450.6968906 | 999.4086167 | 1.14891716  | 0.035789102 | Up | 0.001258837 | Serping1      |
| 14732       | 5720  | 530.9874497 | 1176.389108 | 1.147615664 | 0.01353896  | Up | 5.20E-05    | Gpam          |
| 21452       | 2059  | 243.2384442 | 538.5110077 | 1.146604568 | 0.022654769 | Up | 0.000362328 | Tcn2          |
| 69784       | 1211  | 126.6570439 | 280.4027474 | 1.146573172 | 0.025490008 | Up | 0.000549425 | 1500009L16Rik |
| 16889       | 2990  | 115.0257177 | 254.5174102 | 1.145807889 | 0.032960598 | Up | 0.00102452  | Lipa          |
| 326618      | 2082  | 230.2474692 | 509.3613601 | 1.145504223 | 0.032943791 | Up | 0.001006904 | Tpm4          |
| 26363       | 1956  | 95.77769197 | 211.8711271 | 1.145425421 | 0.030720673 | Up | 0.000855395 | Btd           |
| 56726       | 2856  | 245.2543245 | 541.5239809 | 1.142746652 | 0.037490405 | Up | 0.001381829 | Sh3bgrl       |
| 52538       | 1500  | 467.2292277 | 1031.490569 | 1.1425282   | 0.023191052 | Up | 0.000418209 | Acaa2         |
| 19416       | 1624  | 162.7522034 | 359.1844912 | 1.142047983 | 0.030720673 | Up | 0.000860592 | Rasd1         |
| 228607      | 2950  | 222.1858133 | 490.2265945 | 1.141682049 | 0.023191052 | Up | 0.000420891 | Mavs          |
| 23959       | 3580  | 287.615937  | 634.5516532 | 1.141593987 | 0.027623379 | Up | 0.00065592  | Nt5e          |
| 238871      | 6666  | 106.814194  | 235.0756408 | 1.138021679 | 0.001526022 | Up | 7.24E-07    | Pde4d         |
| 19141       | 1874  | 683.7850744 | 1501.292198 | 1.13458996  | 0.02104232  | Up | 0.0003055   | Lgmn          |
| 384309      | 6393  | 70.58247382 | 154.8477839 | 1.133468835 | 0.022828091 | Up | 0.000369036 | Trim56        |
| 99586       | 4437  | 101.8359538 | 223.3363049 | 1.132970787 | 0.049017662 | Up | 0.002401779 | Dpyd          |

|        |       |             |             |             |             |    |              |               |
|--------|-------|-------------|-------------|-------------|-------------|----|--------------|---------------|
| 211612 | 6489  | 30.75433614 | 67.39802259 | 1.13191643  | 0.030251863 | Up | 0.000831919  | Ptchd1        |
| 207212 | 10250 | 180.5658746 | 395.6349204 | 1.131644508 | 0.022935054 | Up | 0.000377686  | Arhgef17      |
| 17449  | 1958  | 411.1395042 | 899.6402356 | 1.129720186 | 0.023470511 | Up | 0.00043507   | Mdh1          |
| 109552 | 2400  | 76.13897963 | 166.559934  | 1.129334261 | 0.047424351 | Up | 0.002269303  | Sri           |
| 17698  | 3840  | 154.0712131 | 337.00925   | 1.129190858 | 0.024629628 | Up | 0.00050115   | Msn           |
| 14325  | 986   | 1503.482802 | 3287.612748 | 1.128732006 | 0.019171768 | Up | 0.000194718  | Ftl1          |
| 71803  | 1934  | 106.259907  | 232.2477275 | 1.128067125 | 0.016446953 | Up | 0.000103516  | Slc25a18      |
| 407800 | 3626  | 50.93660848 | 111.3181656 | 1.127914231 | 0.044808079 | Up | 0.001995376  | Ecm2          |
| 17311  | 5416  | 515.987896  | 1127.365709 | 1.127546462 | 0.020677778 | Up | 0.000281288  | Kitl          |
| 26757  | 2646  | 182.0950235 | 397.8490198 | 1.127529549 | 0.014400365 | Up | 7.64E-05     | Dpysl4        |
| 77697  | 3021  | 70.36023019 | 153.7213769 | 1.127485696 | 0.044209219 | Up | 0.001930592  | Mmab          |
| 18518  | 1518  | 76.90877751 | 167.9816464 | 1.127083448 | 0.029462304 | Up | 0.000768405  | Igbb1         |
| 12359  | 2551  | 235.4637927 | 514.2772705 | 1.127041159 | 0.045691225 | Up | 0.002109553  | Cat           |
| 13595  | 1757  | 185.1100099 | 404.2471151 | 1.126854566 | 0.026969226 | Up | 0.000626651  | Ebp           |
| 15936  | 1541  | 64.8051337  | 141.4927762 | 1.12654839  | 0.049620513 | Up | 0.002507016  | Ier2          |
| 13846  | 4339  | 80.36512427 | 175.3982238 | 1.125992676 | 0.046306948 | Up | 0.002154362  | Ephb4         |
| 56316  | 3323  | 40.65123168 | 88.67948261 | 1.125301288 | 0.044144165 | Up | 0.0001915731 | Ggxc          |
| 81799  | 2388  | 202.7649133 | 442.321282  | 1.12528663  | 0.022591026 | Up | 0.000359732  | C1qtnf3       |
| 54324  | 5420  | 56.0774045  | 122.2968322 | 1.124895553 | 0.045463114 | Up | 0.002070827  | Arhgef5       |
| 16779  | 5624  | 712.8283262 | 1554.542183 | 1.124863193 | 0.02099543  | Up | 0.000297951  | Lamb2         |
| 11798  | 6411  | 196.4239949 | 427.8680073 | 1.123194631 | 0.031855048 | Up | 0.000942043  | Xiap          |
| 16911  | 1591  | 124.4186625 | 270.381669  | 1.119794442 | 0.038375491 | Up | 0.001460773  | Lmo4          |
| 237107 | 4877  | 151.1687427 | 328.363419  | 1.119133551 | 0.016828865 | Up | 0.000107958  | Gnl3l         |
| 104130 | 853   | 178.65751   | 387.8202868 | 1.118191712 | 0.019290109 | Up | 0.000223979  | Ndufb11       |
| 107702 | 1924  | 394.4526348 | 854.0098864 | 1.114400697 | 0.019171768 | Up | 0.000199004  | Rnh1          |
| 239017 | 3751  | 529.9070491 | 1147.079427 | 1.114154067 | 0.01353896  | Up | 5.29E-05     | Ogdhl         |
| 72535  | 2302  | 322.9240898 | 698.9174368 | 1.113926972 | 0.020012906 | Up | 0.000247198  | Aldh1b1       |
| 235041 | 4853  | 288.8473985 | 624.9904765 | 1.113526705 | 0.023191052 | Up | 0.000419454  | Kank2         |
| 13033  | 1979  | 1290.124127 | 2790.684876 | 1.113109346 | 0.018491729 | Up | 0.000176172  | Ctsd          |
| 216134 | 5110  | 156.7685664 | 338.5512493 | 1.110737929 | 0.024183361 | Up | 0.000486857  | Pdxk          |
| 12492  | 4729  | 335.726461  | 724.2926846 | 1.109286553 | 0.027623379 | Up | 0.000658614  | Scarb2        |
| 83965  | 2530  | 381.9347625 | 823.8011882 | 1.108969972 | 0.021442047 | Up | 0.000319967  | Enpp5         |
| 20444  | 4470  | 153.0505875 | 330.0940575 | 1.108868584 | 0.022763852 | Up | 0.000367016  | St3gal2       |
| 328417 | 6391  | 75.46801762 | 162.5019505 | 1.106519752 | 0.049557727 | Up | 0.002453845  | Parp4         |
| 93761  | 4022  | 202.7396719 | 436.5103894 | 1.10638757  | 0.023091117 | Up | 0.000407133  | Smarca1       |
| 20912  | 2406  | 186.9305294 | 402.243801  | 1.10556798  | 0.025687043 | Up | 0.000563131  | Stxbp3        |
| 673094 | 950   | 479.1665463 | 1030.960092 | 1.105389395 | 0.026148742 | Up | 0.000585041  | Cd99          |
| 56219  | 5551  | 215.529066  | 463.6284064 | 1.10508652  | 0.004887995 | Up | 5.69E-06     | Extl1         |
| 12450  | 3501  | 246.8659854 | 530.9332111 | 1.104802321 | 0.035258064 | Up | 0.001203421  | Ccng1         |
| 319939 | 6365  | 376.2286582 | 808.9005273 | 1.104352555 | 0.022935054 | Up | 0.000375207  | Tns3          |
| 207521 | 5533  | 422.4981739 | 907.3279521 | 1.102678999 | 0.024005571 | Up | 0.000480258  | Dtx4          |
| 56338  | 2799  | 1361.171256 | 2922.72705  | 1.102466513 | 0.022968444 | Up | 0.000392357  | Txnip         |
| 385493 | 3108  | 506.3151909 | 1086.89198  | 1.102100892 | 0.016828865 | Up | 0.000116533  | AU015836      |
| 27060  | 2708  | 78.15953509 | 167.7258117 | 1.101610935 | 0.037248816 | Up | 0.001362492  | Ctirg1        |
| 15446  | 1719  | 140.2860534 | 300.9709087 | 1.101252456 | 0.045691225 | Up | 0.002109483  | Hpgd          |
| 65107  | 3013  | 449.0877737 | 963.0507628 | 1.1006144   | 0.020313741 | Up | 0.000258659  | Lrp10         |
| 16772  | 9518  | 325.2792398 | 696.6005572 | 1.098652878 | 0.016828865 | Up | 0.000112449  | Lama1         |
| 20312  | 3144  | 80.74868615 | 172.8078626 | 1.097658169 | 0.049620513 | Up | 0.002487495  | Cx3cl1        |
| 384071 | 2683  | 56.97759503 | 121.9322362 | 1.09761296  | 0.049620513 | Up | 0.002498769  | Slc25a34      |
| 71562  | 2332  | 48.27061381 | 103.1498425 | 1.095524541 | 0.034712253 | Up | 0.001158727  | Afrmid        |
| 54366  | 3712  | 342.759634  | 732.2695191 | 1.095177528 | 0.019290109 | Up | 0.000221411  | Ctnnal1       |
| 15107  | 1801  | 624.0161683 | 1332.470077 | 1.09444782  | 0.022559424 | Up | 0.00035594   | Hadh          |
| 17127  | 5090  | 145.9362578 | 311.59002   | 1.094310661 | 0.017930932 | Up | 0.00015293   | Smad3         |
| 18081  | 1132  | 157.6922859 | 336.5670649 | 1.09378192  | 0.027754492 | Up | 0.000672416  | Ninj1         |
| 320858 | 4836  | 192.0048069 | 409.4723595 | 1.09262364  | 0.019312244 | Up | 0.00022782   | L3mbtl4       |
| 20832  | 785   | 156.8297554 | 334.3625174 | 1.092213819 | 0.035258064 | Up | 0.001203648  | Ssr4          |
| 68458  | 531   | 78.27620882 | 166.754406  | 1.091079093 | 0.046643947 | Up | 0.002181279  | Ppp1r14a      |
| 12091  | 2128  | 239.7272148 | 510.4922483 | 1.090495355 | 0.023893759 | Up | 0.000461456  | Gilb1         |
| 27357  | 1736  | 60.39743739 | 128.5797456 | 1.090104157 | 0.04008404  | Up | 0.001611016  | Gyg           |
| 66329  | 1144  | 719.8506998 | 1532.270515 | 1.089905636 | 0.029640645 | Up | 0.000784421  | Susd3         |
| 19286  | 1051  | 59.57246839 | 126.6980698 | 1.088676902 | 0.04501294  | Up | 0.00201164   | Pts           |
| 67442  | 1942  | 256.4263454 | 545.0914898 | 1.087953903 | 0.033959546 | Up | 0.001109684  | Retsat        |
| 212647 | 3355  | 203.9900328 | 433.6105998 | 1.087901362 | 0.037963609 | Up | 0.001415637  | Aldh4a1       |
| 224530 | 1991  | 60.0306739  | 127.59042   | 1.087748241 | 0.026378819 | Up | 0.000601599  | Acat3         |
| 22420  | 2093  | 309.8931161 | 657.6520436 | 1.085553764 | 0.024918561 | Up | 0.000526365  | Wnt6          |
| 67131  | 2320  | 53.76513335 | 114.0350069 | 1.084733981 | 0.031877897 | Up | 0.000945467  | Acbd4         |
| 68434  | 1336  | 59.12711197 | 125.286845  | 1.083343225 | 0.038150584 | Up | 0.001442344  | 1010001N08Rik |
| 66881  | 4291  | 237.6505999 | 503.5474433 | 1.083285669 | 0.021442047 | Up | 0.000319807  | Pcyox1        |
| 66904  | 2302  | 226.4246309 | 479.7127248 | 1.083139803 | 0.030720673 | Up | 0.000861744  | Pccb          |
| 215789 | 8290  | 278.9520472 | 590.4873944 | 1.081889122 | 0.01353896  | Up | 5.12E-05     | Phactr2       |
| 209378 | 7942  | 129.5980812 | 274.3308573 | 1.08187255  | 0.029980294 | Up | 0.000818103  | Itih5         |
| 236899 | 4866  | 73.30029334 | 154.9967295 | 1.080346897 | 0.034643284 | Up | 0.001149683  | Pcyt1b        |
| 14824  | 2348  | 393.0932002 | 830.9895821 | 1.079958983 | 0.026681688 | Up | 0.000614984  | Grr           |
| 13860  | 4516  | 327.273058  | 691.712126  | 1.079676907 | 0.019290109 | Up | 0.000220414  | Eps8          |
| 1E+08  | 832   | 68.87486295 | 145.4808302 | 1.078779615 | 0.039195312 | Up | 0.001532108  | Gm11744       |
| 242594 | 3209  | 201.2668781 | 424.946261  | 1.078170637 | 0.022591026 | Up | 0.000360335  | 1700024P16Rik |
| 72157  | 2334  | 130.3296741 | 275.0552356 | 1.077555763 | 0.024559111 | Up | 0.000497598  | Pgm2          |
| 22393  | 3564  | 47.21178817 | 99.38280985 | 1.073849205 | 0.039354662 | Up | 0.001562221  | Wfs1          |
| 11928  | 3720  | 2048.740372 | 4311.548882 | 1.073469067 | 0.020472888 | Up | 0.00027061   | Atp1a1        |
| 217344 | 3749  | 137.0664233 | 288.4315424 | 1.073353742 | 0.037679028 | Up | 0.001393655  | Rhbdf2        |
| 14431  | 960   | 226.8216186 | 477.216915  | 1.073087029 | 0.020701042 | Up | 0.000286641  | Gamt          |

|             |       |             |             |             |             |    |             |            |
|-------------|-------|-------------|-------------|-------------|-------------|----|-------------|------------|
| 12070       | 934   | 97.50920908 | 205.0956149 | 1.072686263 | 0.037279504 | Up | 0.001369755 | Ngfrap1    |
| 72289       | 6982  | 1619.58108  | 3404.295066 | 1.071735393 | 0.01353896  | Up | 5.32E-05    | Malat1     |
| 21814       | 5980  | 408.297325  | 858.1467123 | 1.071604202 | 0.037248816 | Up | 0.001359825 | Tgfbr3     |
| 27643       | 2326  | 79.97419517 | 168.0720127 | 1.071473034 | 0.040719473 | Up | 0.001659642 | Ubl4a      |
| 13010       | 813   | 1844.802797 | 3868.368489 | 1.068258623 | 0.02612498  | Up | 0.000583383 | Cst3       |
| 333639      | 3405  | 109.7742018 | 230.163212  | 1.068118216 | 0.049017662 | Up | 0.002404712 | Mamld1     |
| 11932       | 2959  | 634.8998498 | 1331.025119 | 1.067936856 | 0.01353896  | Up | 4.80E-05    | Atp1b2     |
| 22017       | 1777  | 92.47508049 | 193.6710921 | 1.066472073 | 0.016828865 | Up | 0.000112478 | Tpmt       |
| 208618      | 7498  | 575.6495266 | 1204.114479 | 1.064709935 | 0.01353896  | Up | 4.16E-05    | Etl4       |
| 227737      | 3693  | 69.07994124 | 144.3049426 | 1.062781954 | 0.035605657 | Up | 0.001231488 | Fam129b    |
| 66940       | 1833  | 109.9900361 | 229.6802835 | 1.062254179 | 0.040719473 | Up | 0.001656003 | Shisa5     |
| 14775       | 1066  | 363.44579   | 758.8768482 | 1.062125588 | 0.045606723 | Up | 0.002085319 | Gpx1       |
| 104112      | 4422  | 1196.703869 | 2498.285464 | 1.061872142 | 0.019290109 | Up | 0.00022426  | Acly       |
| 67972       | 7107  | 363.4138478 | 758.4029518 | 1.061351185 | 0.028101949 | Up | 0.000688363 | Atp2b1     |
| 67125       | 1543  | 155.0889133 | 323.6170291 | 1.061191969 | 0.038375491 | Up | 0.001457881 | Tspan31    |
| 68738       | 3594  | 287.6602479 | 599.6886368 | 1.059847769 | 0.020701042 | Up | 0.000286753 | Acss1      |
| 320429      | 11187 | 1877.685287 | 3913.99657  | 1.059687214 | 0.003532137 | Up | 2.74E-06    | Trank1     |
| 16998       | 5194  | 149.5997977 | 311.7142088 | 1.059115695 | 0.028876349 | Up | 0.000743164 | Ltbp3      |
| 68024       | 728   | 134.0921095 | 279.1363477 | 1.057745651 | 0.046420684 | Up | 0.002167246 | Hist1h2bc  |
| 67784       | 6913  | 387.7342062 | 806.9673983 | 1.057442373 | 0.023044425 | Up | 0.000402615 | Plxnd1     |
| 15273       | 9788  | 98.48830394 | 204.9487626 | 1.057238968 | 0.023594022 | Up | 0.000442403 | Hivep2     |
| 14381       | 2639  | 176.7991764 | 367.9090127 | 1.057237465 | 0.046417616 | Up | 0.002165102 | G6pdx      |
| 433904      | 2510  | 47.55580383 | 98.88273751 | 1.056097262 | 0.02551577  | Up | 0.00055108  | Ociad2     |
| 78781       | 5241  | 151.9173841 | 315.7761669 | 1.055615319 | 0.035111726 | Up | 0.001188201 | Zc3hav1    |
| 11515       | 7840  | 264.4864338 | 549.6846889 | 1.05541057  | 0.023757041 | Up | 0.000452671 | Adcy9      |
| 66885       | 3513  | 566.842895  | 1177.161147 | 1.05429099  | 0.023191052 | Up | 0.000415637 | Acad5b     |
| 237339      | 4649  | 74.86208278 | 155.4128005 | 1.053798244 | 0.031567216 | Up | 0.000918532 | L3mbt13    |
| 11835       | 10063 | 192.6976052 | 399.9322051 | 1.053416818 | 0.024005571 | Up | 0.000480512 | Ar         |
| 239647      | 2663  | 119.3597554 | 247.6789054 | 1.053154517 | 0.02739735  | Up | 0.000641323 | Pced1b     |
| 20102       | 992   | 398.139794  | 826.1593269 | 1.05314496  | 0.041550199 | Up | 0.001715959 | Rps4x      |
| 12751       | 3573  | 199.0091706 | 412.9075842 | 1.052984004 | 0.041831776 | Up | 0.001735916 | Tpp1       |
| 66948       | 2865  | 243.8487486 | 505.8378972 | 1.052688559 | 0.028721913 | Up | 0.000729284 | Acad8      |
| 83675       | 3214  | 111.3633144 | 231.0007334 | 1.052623378 | 0.033385695 | Up | 0.001062148 | Bicc1      |
| 12549       | 7722  | 355.569489  | 737.0612821 | 1.051653042 | 0.024005571 | Up | 0.000480705 | Arhgap31   |
| 74257       | 1567  | 270.1178756 | 559.7892631 | 1.051294699 | 0.022968444 | Up | 0.000385635 | Tspan17    |
| 245607      | 4044  | 364.7578665 | 755.6934257 | 1.05086198  | 0.004898185 | Up | 7.18E-06    | Gsprasp2   |
| 54447       | 4835  | 114.92228   | 237.6791004 | 1.048356529 | 0.029800929 | Up | 0.000802931 | Asah2      |
| 75124       | 1158  | 81.84806803 | 169.2003355 | 1.047712161 | 0.042307773 | Up | 0.001773256 | Nxnrl2     |
| 22228       | 1583  | 670.9232276 | 1386.903064 | 1.047647359 | 0.020472888 | Up | 0.000270556 | Ucp2       |
| 100198      | 4705  | 350.4331135 | 724.3939556 | 1.047635402 | 0.030087365 | Up | 0.000823618 | H6pd       |
| 67893       | 1791  | 457.2929709 | 944.9364847 | 1.047098616 | 0.029800929 | Up | 0.000802365 | Tmem86a    |
| 20692       | 2640  | 5189.925165 | 10722.05836 | 1.046796252 | 0.02476866  | Up | 0.000520344 | Sparc      |
| 11881       | 3989  | 242.5144898 | 500.2751926 | 1.044650966 | 0.049620513 | Up | 0.002501432 | Arsb       |
| 171486      | 3610  | 209.0419019 | 431.1365524 | 1.044352726 | 0.028101949 | Up | 0.000689314 | Cd99l2     |
| 320078      | 3105  | 181.4734381 | 373.918015  | 1.042963581 | 0.042811427 | Up | 0.00181726  | Olfml2b    |
| 16210       | 3432  | 146.7715227 | 302.3816585 | 1.042798556 | 0.026396623 | Up | 0.000604242 | Impact     |
| 57776       | 2869  | 801.076424  | 1650.211838 | 1.042639446 | 0.01390321  | Up | 6.35E-05    | Ttyh1      |
| 16476       | 3187  | 181.3656972 | 373.426639  | 1.041923232 | 0.045463114 | Up | 0.002071583 | Jun        |
| 16562       | 6681  | 437.0823636 | 899.8741297 | 1.041818052 | 0.028452627 | Up | 0.000704048 | Kif1c      |
| 74142       | 2970  | 540.2799736 | 1112.153669 | 1.041577031 | 0.020701042 | Up | 0.000287353 | Lonp1      |
| 214616      | 2327  | 91.61097975 | 188.576524  | 1.041557662 | 0.025157319 | Up | 0.000557226 | Spata5l1   |
| 56543       | 7418  | 216.9234794 | 446.1728135 | 1.040416393 | 0.019290109 | Up | 0.000221246 | Kcnd3      |
| 69215       | 1551  | 115.1204961 | 236.6374848 | 1.039533909 | 0.048257394 | Up | 0.00233829  | Sat2       |
| 50887       | 1911  | 170.2426374 | 349.9386912 | 1.03950978  | 0.017930932 | Up | 0.000154078 | Hmgm5      |
| 14057       | 2809  | 110.6455393 | 227.434744  | 1.039507374 | 0.031024337 | Up | 0.000879099 | Sfxn1      |
| 11513       | 6186  | 229.1801555 | 471.0206188 | 1.039308087 | 0.016828865 | Up | 0.00011526  | Adcy7      |
| 12826       | 6636  | 406.4449922 | 835.2685581 | 1.039180019 | 0.030945469 | Up | 0.000873789 | Col4a1     |
| 20893       | 3113  | 100.4821748 | 206.3390361 | 1.038077187 | 0.039195312 | Up | 0.001536051 | Bhlhe40    |
| 16410       | 7055  | 167.612479  | 344.1320179 | 1.037832562 | 0.041416086 | Up | 0.001708635 | Ilgav      |
| 245688      | 2272  | 1156.149956 | 2373.63877  | 1.037771865 | 0.017851899 | Up | 0.00014183  | Rbbp7      |
| 74012       | 4197  | 128.1376846 | 262.886775  | 1.036746739 | 0.029978671 | Up | 0.000811755 | Rap2b      |
| 16564       | 7131  | 586.6145789 | 1202.9384   | 1.036077936 | 0.01390321  | Up | 6.55E-05    | Kif21a     |
| 16456       | 2482  | 418.9978776 | 859.1311929 | 1.035935518 | 0.016828865 | Up | 0.000112508 | F11r       |
| 56722       | 2240  | 252.7320132 | 518.0754607 | 1.03555383  | 0.039546979 | Up | 0.001578612 | Litaf      |
| 23986       | 1517  | 191.8593053 | 393.2565861 | 1.035422189 | 0.039195312 | Up | 0.001538079 | Eci2       |
| 12822       | 5081  | 391.5729045 | 802.5858349 | 1.035374755 | 0.021004646 | Up | 0.000299717 | Col18a1    |
| 13170       | 1678  | 127.0061452 | 260.2673659 | 1.035096124 | 0.032960598 | Up | 0.001015888 | Dbp        |
| 117160      | 3456  | 389.0036886 | 796.6053693 | 1.034081369 | 0.025157319 | Up | 0.000538179 | Ttyh2      |
| 71323       | 1733  | 28.39777446 | 58.14668601 | 1.0339191   | 0.049620513 | Up | 0.002482707 | Rassf8     |
| 14149       | 1866  | 515.3929512 | 1053.558972 | 1.031526359 | 0.029640645 | Up | 0.000786783 | Fdxr       |
| 20440       | 4348  | 236.7238396 | 483.8320559 | 1.031301355 | 0.049017662 | Up | 0.002393123 | St6gal1    |
| 22352       | 1834  | 1176.546715 | 2404.294486 | 1.031055009 | 0.028101949 | Up | 0.000684593 | Vim        |
| BGI_novel_1 | 6998  | 699.7434006 | 1429.73064  | 1.03084549  | 0.020859299 | Up | 0.000294046 | NA         |
| 17684       | 1980  | 333.4298739 | 680.87643   | 1.030009623 | 0.019171768 | Up | 0.000191813 | Cited2     |
| 72345       | 8476  | 83.72110963 | 170.9367844 | 1.02979955  | 0.035789102 | Up | 0.001254694 | Amer1      |
| 15356       | 1416  | 119.1077383 | 243.1386837 | 1.0295123   | 0.029800929 | Up | 0.000797803 | Hmgcl      |
| 16322       | 1463  | 1131.135656 | 2307.328385 | 1.028451386 | 0.01874945  | Up | 0.000182507 | Inha       |
| 58220       | 3409  | 193.4098137 | 394.4998953 | 1.028363918 | 0.0224309   | Up | 0.000350045 | Pard6b     |
| 217069      | 5596  | 259.6726556 | 529.4639541 | 1.027838368 | 0.030720673 | Up | 0.000851496 | Trim25     |
| 244418      | 4780  | 45.11939199 | 91.98880224 | 1.027710626 | 0.033951002 | Up | 0.001107941 | D8Erttd82e |
| 11852       | 2264  | 436.9149491 | 890.69372   | 1.027576953 | 0.019290109 | Up | 0.00022055  | Rhob       |

|        |      |             |             |             |             |    |             |          |
|--------|------|-------------|-------------|-------------|-------------|----|-------------|----------|
| 245007 | 4454 | 122.8537722 | 250.4174864 | 1.027393152 | 0.03252863  | Up | 0.000983257 | Zbtb38   |
| 226519 | 7622 | 216.753332  | 441.6584325 | 1.026876886 | 0.026891797 | Up | 0.000623692 | Lamc1    |
| 52808  | 2772 | 510.7190498 | 1040.209097 | 1.026271782 | 0.014400365 | Up | 7.52E-05    | Tspsy12  |
| 24136  | 9036 | 244.1613679 | 496.8676308 | 1.025026609 | 0.031567216 | Up | 0.000922553 | Zeb2     |
| 223649 | 3033 | 646.9736907 | 706.0477922 | 1.024939568 | 0.024005571 | Up | 0.000482243 | Nrbp2    |
| 108735 | 5526 | 465.7649541 | 947.6641582 | 1.024773785 | 0.021898165 | Up | 0.000334459 | Sft2d2   |
| 18760  | 3764 | 84.89946432 | 172.722982  | 1.0246327   | 0.039619418 | Up | 0.00158669  | Prkd1    |
| 14590  | 1355 | 252.949145  | 514.5943235 | 1.02458818  | 0.029866885 | Up | 0.000805995 | Ggh      |
| 66205  | 1363 | 200.261594  | 407.3960619 | 1.024546266 | 0.042811427 | Up | 0.0018233   | Cd302    |
| 214253 | 2280 | 581.3616411 | 1182.4397   | 1.024258824 | 0.017959615 | Up | 0.000162253 | Etnk2    |
| 21825  | 5863 | 122.6211507 | 249.3995291 | 1.024250892 | 0.022968444 | Up | 0.000396823 | Thbs1    |
| 14797  | 1488 | 1030.37231  | 2095.581163 | 1.02418467  | 0.024658689 | Up | 0.000507104 | Aes      |
| 246198 | 7271 | 564.8625888 | 1148.804251 | 1.024161135 | 0.021573891 | Up | 0.00032365  | Mllt6    |
| 76763  | 3480 | 99.92950867 | 202.8644605 | 1.021533477 | 0.04728735  | Up | 0.002252993 | Mospd2   |
| 14423  | 3912 | 645.4094873 | 1310.047488 | 1.021332419 | 0.016134252 | Up | 9.88E-05    | Galnt1   |
| 235527 | 3259 | 51.12397185 | 103.7454509 | 1.020976248 | 0.04424094  | Up | 0.001934024 | Plscr4   |
| 13602  | 3132 | 640.6977058 | 1299.973479 | 1.020766462 | 0.035383393 | Up | 0.001212473 | Sparc1   |
| 14187  | 1304 | 586.4696337 | 1189.914143 | 1.020729165 | 0.020012906 | Up | 0.000247605 | Akr1b8   |
| 12807  | 3821 | 116.0092543 | 235.3034434 | 1.020282536 | 0.033000932 | Up | 0.001028567 | Hps3     |
| 22333  | 2036 | 444.952836  | 902.4320529 | 1.020165889 | 0.020701042 | Up | 0.000285127 | Vdac1    |
| 215693 | 3733 | 143.3433301 | 290.6214777 | 1.01966655  | 0.020677778 | Up | 0.000278123 | Zmat1    |
| 71183  | 1565 | 166.3713868 | 337.2346725 | 1.019345539 | 0.022535723 | Up | 0.000354595 | Clec12b  |
| 17999  | 5494 | 1699.915696 | 3445.670106 | 1.019321382 | 0.018793863 | Up | 0.000185532 | Nedd4    |
| 14870  | 746  | 414.5631717 | 840.1328395 | 1.019025503 | 0.035605657 | Up | 0.001231241 | Gstp1    |
| 14467  | 2115 | 307.697941  | 623.5043978 | 1.018884946 | 0.022968444 | Up | 0.000391836 | Gbas     |
| 93747  | 1491 | 365.2575142 | 739.9071244 | 1.018430237 | 0.045691225 | Up | 0.002098921 | Echs1    |
| 23928  | 5930 | 612.2506153 | 1240.201553 | 1.018380377 | 0.019290109 | Up | 0.000214481 | Lamc3    |
| 11757  | 1445 | 385.1288637 | 779.7463672 | 1.017663675 | 0.031048326 | Up | 0.000883386 | Prdx3    |
| 19156  | 2666 | 4825.921149 | 9770.328671 | 1.017602751 | 0.020677778 | Up | 0.000280189 | Psap     |
| 71263  | 2066 | 396.613923  | 802.6962299 | 1.017118798 | 0.017934955 | Up | 0.000158497 | Mro      |
| 235611 | 8600 | 342.8566367 | 693.7758445 | 1.016864162 | 0.022968444 | Up | 0.000397049 | Plxnb1   |
| 16452  | 5055 | 167.1071249 | 338.0309851 | 1.016382248 | 0.032960598 | Up | 0.001024638 | Jak2     |
| 19025  | 3386 | 247.532415  | 500.28582   | 1.015135099 | 0.038112899 | Up | 0.001432705 | Ctsa     |
| 231801 | 2927 | 287.1427542 | 579.9995448 | 1.014283611 | 0.017399038 | Up | 0.00012976  | Agfg2    |
| 17886  | 7439 | 422.4222125 | 853.2020561 | 1.014201743 | 0.034956546 | Up | 0.001176922 | Mylh9    |
| 22117  | 1096 | 210.3141158 | 424.6145315 | 1.013608061 | 0.024658689 | Up | 0.000509183 | Tst      |
| 94280  | 2968 | 255.4257289 | 515.3558523 | 1.0126651   | 0.0288274   | Up | 0.000738176 | Sfxn3    |
| 14433  | 1414 | 1745.029545 | 3519.625804 | 1.012170592 | 0.022968444 | Up | 0.000389701 | Gapdh    |
| 67068  | 721  | 123.1387838 | 248.3215852 | 1.011924447 | 0.023044425 | Up | 0.000401921 | Dynlrb1  |
| 72007  | 6901 | 458.3332625 | 923.4461124 | 1.010630785 | 0.019171768 | Up | 0.000193423 | Fndc3b   |
| 12759  | 1832 | 14051.95064 | 28308.8331  | 1.010481868 | 0.019290109 | Up | 0.000225071 | Clu      |
| 13205  | 4571 | 742.1425309 | 1494.934122 | 1.010313717 | 0.024683086 | Up | 0.000511403 | Ddx3x    |
| 66684  | 2256 | 133.8249256 | 269.5637652 | 1.010279732 | 0.04008404  | Up | 0.001614112 | Tceal8   |
| 209225 | 4517 | 107.3900826 | 216.2818976 | 1.010052152 | 0.017930932 | Up | 0.000153278 | Zfp710   |
| 17988  | 2909 | 228.7906856 | 460.2132988 | 1.008274354 | 0.028596161 | Up | 0.000718695 | Ndrgr1   |
| 11740  | 1317 | 622.5323913 | 1250.520033 | 1.006307359 | 0.028101949 | Up | 0.000689107 | Slc25a5  |
| 54609  | 3343 | 366.9394171 | 736.9664998 | 1.006057151 | 0.014039847 | Up | 7.01E-05    | Ublq1n2  |
| 59044  | 1658 | 302.8654233 | 608.2783554 | 1.006054787 | 0.023890029 | Up | 0.000460354 | Rnf130   |
| 76795  | 5229 | 642.9605484 | 1290.373886 | 1.004987025 | 0.020701042 | Up | 0.000286846 | Tbc1d9b  |
| 17872  | 2345 | 99.48132112 | 199.4967028 | 1.00386733  | 0.028797722 | Up | 0.000732451 | Ppp1r15a |
| 12036  | 1781 | 553.311957  | 1109.243396 | 1.003410959 | 0.025998192 | Up | 0.00057831  | Bcat2    |
| 73124  | 4526 | 132.8593991 | 266.2995664 | 1.003149785 | 0.047431598 | Up | 0.002276802 | Golim4   |
| 22174  | 4009 | 984.1386357 | 1972.093344 | 1.002794372 | 0.016828865 | Up | 0.000114283 | Tyro3    |
| 270076 | 2150 | 85.54772127 | 171.3828107 | 1.002421086 | 0.039195312 | Up | 0.00153106  | Gcdh     |
| 20352  | 3946 | 190.4750925 | 381.553135  | 1.002281624 | 0.037248816 | Up | 0.001362586 | Sema4b   |
| 14609  | 3105 | 848.1172135 | 1696.16584  | 0.999941664 | 0.017851899 | Up | 0.000142238 | Gja1     |
| 320736 | 2743 | 214.8567424 | 429.6376823 | 0.999745482 | 0.025687043 | Up | 0.000564102 | Vstm4    |
| 217517 | 4325 | 86.07535101 | 172.0275873 | 0.998967878 | 0.041416086 | Up | 0.001707187 | Stxbp6   |
| 20787  | 4297 | 301.8692348 | 602.949131  | 0.99811256  | 0.025490008 | Up | 0.000549346 | Sreb1f1  |
| 74365  | 7509 | 1068.866118 | 2134.760567 | 0.99799311  | 0.01609485  | Up | 9.78E-05    | Lonrf3   |
| 69581  | 3367 | 308.0198864 | 614.922287  | 0.997380599 | 0.024658689 | Up | 0.000506901 | Rhou     |
| 57783  | 2799 | 184.9700383 | 369.1970712 | 0.997099508 | 0.04728735  | Up | 0.002258683 | Tnip1    |
| 72281  | 2767 | 135.7501102 | 270.8875534 | 0.996740737 | 0.03252863  | Up | 0.000982038 | Sh2d4a   |
| 104718 | 3458 | 232.6984492 | 464.2970635 | 0.99658656  | 0.033631455 | Up | 0.001074316 | Ttc7b    |
| 229615 | 2951 | 95.66258065 | 190.8652319 | 0.996527709 | 0.021041371 | Up | 0.000303869 | Pias3    |
| 22278  | 1801 | 227.4809097 | 453.6804569 | 0.995931036 | 0.016828865 | Up | 0.000119166 | Usf1     |
| 72039  | 2992 | 140.0296209 | 279.2554748 | 0.995853528 | 0.041831776 | Up | 0.001738407 | Mccc1    |
| 192194 | 4772 | 390.2997001 | 778.0895606 | 0.99535387  | 0.020089981 | Up | 0.000249425 | Btln10   |
| 12833  | 3990 | 234.6102993 | 467.475237  | 0.994623597 | 0.04297249  | Up | 0.00183583  | Col6a1   |
| 67739  | 2526 | 319.4865456 | 636.4422429 | 0.994274419 | 0.034700235 | Up | 0.00115483  | Slc48a1  |
| 268860 | 4648 | 987.2431426 | 1966.624279 | 0.994244012 | 0.019290109 | Up | 0.000206296 | Abat     |
| 268880 | 3111 | 50.17333797 | 99.90692931 | 0.993663821 | 0.032896476 | Up | 0.00100404  | Xxy1t1   |
| 26362  | 5035 | 912.5240679 | 1816.246386 | 0.993025411 | 0.016828865 | Up | 0.000117286 | Axl      |
| 72759  | 3693 | 171.3269191 | 340.981543  | 0.992941802 | 0.025892336 | Up | 0.00057484  | Tmem135  |
| 17254  | 2612 | 2066.308365 | 4111.098176 | 0.992468254 | 0.023091117 | Up | 0.000406934 | Slc3a2   |
| 56078  | 3465 | 82.63550651 | 164.3775828 | 0.992179852 | 0.04728735  | Up | 0.00225436  | Car5b    |
| 225791 | 3321 | 255.2537265 | 507.6992083 | 0.992041987 | 0.021442047 | Up | 0.000318411 | Zadh2    |
| 22248  | 1335 | 443.538584  | 881.5647597 | 0.991006942 | 0.019656249 | Up | 0.000235422 | Unc119   |
| 104923 | 1676 | 126.885569  | 252.1112434 | 0.990532462 | 0.049017662 | Up | 0.002400313 | Adi1     |
| 68833  | 1706 | 79.03126255 | 157.0247845 | 0.990496929 | 0.031567216 | Up | 0.000917693 | Pdcl3    |
| 23794  | 8104 | 163.6067578 | 324.9857673 | 0.990144197 | 0.049211656 | Up | 0.002420593 | Adamts5  |



|        |       |             |             |             |             |    |             |             |
|--------|-------|-------------|-------------|-------------|-------------|----|-------------|-------------|
| 622404 | 814   | 99.60994977 | 197.8598151 | 0.990116873 | 0.027754492 | Up | 0.00067182  | Ccdc107     |
| 18648  | 1855  | 1060.930044 | 2106.669735 | 0.989634628 | 0.026788615 | Up | 0.000618989 | Pgam1       |
| 74149  | 2944  | 49.89303878 | 98.98630447 | 0.98839039  | 0.049593476 | Up | 0.002462891 | Zfp946      |
| 22628  | 3592  | 581.3693849 | 1153.160773 | 0.988066661 | 0.024005571 | Up | 0.000478875 | Ywhag       |
| 17936  | 5098  | 274.3574861 | 543.6947122 | 0.986739855 | 0.031567216 | Up | 0.000917068 | Nab1        |
| 14460  | 1900  | 151.8835546 | 300.9065457 | 0.986349822 | 0.033255253 | Up | 0.001043662 | Gata1       |
| 66395  | 13754 | 620.0342907 | 1227.912129 | 0.985787413 | 0.044367586 | Up | 0.001954721 | Ahnak       |
| 16832  | 1335  | 1486.734658 | 2939.184355 | 0.983268664 | 0.022968444 | Up | 0.000384256 | Ldhd        |
| 16155  | 1878  | 163.5257484 | 322.8757959 | 0.981461478 | 0.04728735  | Up | 0.002260709 | Il10rb      |
| 27355  | 4289  | 282.4376764 | 557.5898233 | 0.981271677 | 0.028596161 | Up | 0.000716489 | Pald1       |
| 15216  | 1722  | 162.6951809 | 321.1466187 | 0.981060588 | 0.04619093  | Up | 0.002138782 | Hfe         |
| 74720  | 1406  | 270.4904602 | 533.8086348 | 0.980744929 | 0.019290109 | Up | 0.000206432 | Tmem114     |
| 73910  | 3616  | 187.616959  | 370.2422149 | 0.980679159 | 0.049884917 | Up | 0.002528976 | Arhgap18    |
| 234378 | 3019  | 77.83602071 | 153.5444633 | 0.98014663  | 0.046306948 | Up | 0.002156752 | Klhl26      |
| 71435  | 6944  | 176.8991293 | 348.901186  | 0.979891555 | 0.03837023  | Up | 0.001453957 | Arhgap21    |
| 27059  | 7151  | 415.2416337 | 818.3082555 | 0.978693306 | 0.01609485  | Up | 9.61E-05    | Sh3d19      |
| 14683  | 1714  | 2203.028247 | 4340.909747 | 0.978509434 | 0.020472888 | Up | 0.00027183  | Gnas        |
| 245572 | 2943  | 99.25113275 | 195.3735639 | 0.977079795 | 0.020701042 | Up | 0.000284704 | Tbx22       |
| 21672  | 1476  | 795.7996412 | 1566.475187 | 0.977044764 | 0.033356611 | Up | 0.001052666 | Prdx2       |
| 103012 | 4799  | 217.8688477 | 428.4423586 | 0.975641196 | 0.029800929 | Up | 0.000798475 | Fire        |
| 20539  | 3513  | 3133.457238 | 6161.792096 | 0.9755947   | 0.017903692 | Up | 0.000146644 | Slc7a5      |
| 21676  | 9658  | 146.7851949 | 288.2132409 | 0.973430155 | 0.049620513 | Up | 0.002495604 | Tead1       |
| 12616  | 2827  | 444.1704628 | 872.0243745 | 0.973255004 | 0.019290109 | Up | 0.000215729 | Cenpb       |
| 19072  | 2768  | 172.791176  | 338.972252  | 0.972137635 | 0.017930932 | Up | 0.000156515 | Prep        |
| 333433 | 4393  | 168.0858595 | 329.6119457 | 0.971570169 | 0.034143519 | Up | 0.001120111 | Gpd1l       |
| 69274  | 4203  | 296.6608131 | 581.7117064 | 0.971489969 | 0.020012906 | Up | 0.000244953 | Ctdspl      |
| 75104  | 2159  | 765.2304595 | 1500.43579  | 0.971415376 | 0.022968444 | Up | 0.000391316 | Mmd2        |
| 11988  | 7722  | 285.1976047 | 558.8764104 | 0.970567417 | 0.038943683 | Up | 0.00149919  | Slc7a2      |
| 13497  | 6645  | 154.588993  | 302.8446017 | 0.970140094 | 0.037963609 | Up | 0.001412644 | Drp2        |
| 68799  | 2633  | 87.348292   | 170.8011987 | 0.967466702 | 0.033843391 | Up | 0.001093454 | Rgmb        |
| 14555  | 2809  | 483.7711242 | 945.9483352 | 0.967436731 | 0.023934064 | Up | 0.000465339 | Gpd1        |
| 19341  | 1427  | 81.44795294 | 159.2510432 | 0.967352479 | 0.035180161 | Up | 0.001192034 | Rab4a       |
| 330319 | 4257  | 854.8598072 | 1671.454374 | 0.967344224 | 0.014922825 | Up | 7.98E-05    | Wipf3       |
| 226999 | 3493  | 189.0992253 | 369.5704621 | 0.966706001 | 0.021442047 | Up | 0.000320748 | Slc9a2      |
| 108927 | 2107  | 172.7765487 | 337.6486246 | 0.96661527  | 0.041103186 | Up | 0.001680822 | Lhfp        |
| 17992  | 492   | 213.542319  | 417.169896  | 0.966113047 | 0.029640645 | Up | 0.000784741 | Ndufa4      |
| 20905  | 2283  | 72.0236377  | 140.6466065 | 0.965532371 | 0.039354662 | Up | 0.001562039 | Sts         |
| 14766  | 3514  | 625.9268874 | 1221.544769 | 0.964640684 | 0.021442047 | Up | 0.000316812 | Adgrg1      |
| 17387  | 3801  | 491.7255648 | 958.8879598 | 0.963508892 | 0.029638563 | Up | 0.000775558 | Mmp14       |
| 72017  | 1784  | 523.018942  | 1019.795239 | 0.963344406 | 0.023044425 | Up | 0.000400512 | Cyb5r1      |
| 68597  | 4489  | 62.13215249 | 121.1251786 | 0.963086853 | 0.029978671 | Up | 0.000813895 | Ccdc167     |
| 170676 | 6590  | 1029.841354 | 2006.41435  | 0.962197463 | 0.019290109 | Up | 0.000214688 | Peg10       |
| 59009  | 5199  | 138.5753317 | 269.5196042 | 0.959719755 | 0.021898165 | Up | 0.000330306 | Sh3r1       |
| 66471  | 3271  | 320.0540642 | 622.1526022 | 0.958952861 | 0.020836508 | Up | 0.000291156 | Anp32e      |
| 320237 | 3064  | 239.2774253 | 465.1130518 | 0.958897133 | 0.029800929 | Up | 0.000795916 | Ssim10l2a   |
| 15452  | 1349  | 147.4268155 | 286.5709934 | 0.958893627 | 0.016828865 | Up | 0.000111071 | Hprt        |
| 107515 | 5066  | 208.0438788 | 404.3567823 | 0.958740969 | 0.032792895 | Up | 0.000999457 | Lgr4        |
| 664862 | 2956  | 91.22922894 | 177.2804663 | 0.958465553 | 0.045691225 | Up | 0.002097685 | Gpr137b-ps  |
| 15277  | 5524  | 546.2277163 | 1059.730276 | 0.956122689 | 0.018393264 | Up | 0.000172698 | Hk2         |
| 13167  | 587   | 384.3334905 | 745.4121047 | 0.95567955  | 0.031567216 | Up | 0.000915247 | Dbi         |
| 52428  | 3439  | 230.7143673 | 447.2208326 | 0.954879546 | 0.026378819 | Up | 0.000602698 | Rhpn2       |
| 230857 | 4742  | 327.8999716 | 635.5609305 | 0.954774665 | 0.029194681 | Up | 0.000756391 | Ece1        |
| 227292 | 2790  | 254.8143758 | 493.7348157 | 0.954289708 | 0.045107523 | Up | 0.002041391 | Ctdsp1      |
| 72133  | 3980  | 53.57862496 | 103.7641782 | 0.953579016 | 0.039354662 | Up | 0.001561231 | Trub1       |
| 66922  | 2289  | 243.2491959 | 470.9601424 | 0.953169933 | 0.026378819 | Up | 0.000600846 | Rras2       |
| 52118  | 2902  | 133.8987108 | 259.0910613 | 0.952317173 | 0.034712253 | Up | 0.00115886  | Pvr         |
| 50935  | 2423  | 257.3061023 | 497.87256   | 0.952290831 | 0.038827993 | Up | 0.001489514 | St6galnacc6 |
| 18611  | 2477  | 374.1293993 | 723.8958987 | 0.952244905 | 0.036328559 | Up | 0.001306569 | Pea15a      |
| 20356  | 10809 | 217.2968515 | 420.1302724 | 0.951169472 | 0.04501294  | Up | 0.002014201 | Sema5a      |
| 26401  | 6963  | 233.7463829 | 451.8585826 | 0.950927286 | 0.01353896  | Up | 4.27E-05    | Map3k1      |
| 67771  | 1897  | 412.1397649 | 796.2246136 | 0.950041803 | 0.022968444 | Up | 0.000394671 | Arpc5       |
| 56462  | 1710  | 372.7637679 | 719.8893347 | 0.949513505 | 0.022968444 | Up | 0.000379564 | Mtch1       |
| 54651  | 3367  | 120.5359969 | 232.7148089 | 0.949098963 | 0.029640645 | Up | 0.000784877 | Usp27x      |
| 70350  | 1855  | 504.1101399 | 972.8282528 | 0.948446154 | 0.016828865 | Up | 0.000118919 | Basp1       |
| 20848  | 4517  | 594.9255265 | 1147.699892 | 0.94796446  | 0.035843836 | Up | 0.001262422 | Stat3       |
| 66995  | 2869  | 53.58950784 | 103.3689669 | 0.947780657 | 0.042503389 | Up | 0.001793802 | Zcchc18     |
| 20971  | 2460  | 592.0368824 | 1141.679579 | 0.947398844 | 0.023191052 | Up | 0.000422892 | Sdc4        |
| 13803  | 4752  | 426.7213799 | 822.6261179 | 0.946942482 | 0.023594022 | Up | 0.00044635  | Enc1        |
| 16777  | 5780  | 294.1839516 | 566.4515355 | 0.94523398  | 0.032485267 | Up | 0.000977485 | Lamb1       |
| 66208  | 658   | 181.8364195 | 350.0727225 | 0.94501347  | 0.046643947 | Up | 0.002183702 | Nenf        |
| 20909  | 1372  | 133.8053276 | 257.5905191 | 0.944943935 | 0.034058715 | Up | 0.001115861 | Stx4a       |
| 216190 | 3260  | 1017.561473 | 1958.646274 | 0.944740921 | 0.020313741 | Up | 0.000260782 | Appl2       |
| 320924 | 5668  | 349.5958736 | 672.7739144 | 0.944433613 | 0.037248816 | Up | 0.001362093 | Ccbe1       |
| 20112  | 5435  | 732.1450892 | 1408.188252 | 0.943638731 | 0.022274541 | Up | 0.000345345 | Rps6ka2     |
| 245610 | 3948  | 1216.328527 | 2338.023955 | 0.942756762 | 0.01390321  | Up | 6.80E-05    | Nxf3        |
| 22589  | 10244 | 333.6565328 | 640.8981431 | 0.941731339 | 0.039354662 | Up | 0.001562514 | Atrx        |
| 74123  | 4019  | 211.3878341 | 405.8365799 | 0.94100656  | 0.026297699 | Up | 0.000594042 | Foxp4       |
| 68859  | 3440  | 264.8479225 | 508.358996  | 0.940683476 | 0.022472046 | Up | 0.000351656 | Ssim1       |
| 208968 | 4046  | 146.7243864 | 281.5638799 | 0.940353596 | 0.023955121 | Up | 0.000468838 | Zfp280c     |
| 208292 | 10857 | 199.8003112 | 383.0641226 | 0.939027081 | 0.048239792 | Up | 0.002333387 | Zfp871      |
| 66515  | 5546  | 197.4058951 | 378.4657227 | 0.938997569 | 0.033829625 | Up | 0.001087142 | Cul7        |

|        |       |             |             |             |             |    |             |               |
|--------|-------|-------------|-------------|-------------|-------------|----|-------------|---------------|
| 18641  | 3741  | 396.5791603 | 760.0697491 | 0.938522948 | 0.048105517 | Up | 0.002322636 | Pfkl          |
| 26900  | 4638  | 289.1725075 | 554.1211805 | 0.938271115 | 0.026681688 | Up | 0.000613752 | Ddx3y         |
| 53331  | 2357  | 223.1592986 | 427.5814168 | 0.938125231 | 0.04501294  | Up | 0.002010801 | Stx7          |
| 54712  | 6922  | 466.6335282 | 893.7463538 | 0.937575481 | 0.023102819 | Up | 0.000408335 | Plxnc1        |
| 72599  | 1823  | 369.846573  | 708.3016338 | 0.937436962 | 0.024683086 | Up | 0.000513889 | Pdia5         |
| 69202  | 1151  | 328.873233  | 629.5583096 | 0.936808414 | 0.031189429 | Up | 0.000891434 | Ptms          |
| 71943  | 2175  | 113.1617794 | 216.5823722 | 0.936529058 | 0.032094646 | Up | 0.000956046 | Tom11l        |
| 68041  | 2056  | 260.7843641 | 499.1011571 | 0.936474876 | 0.045107523 | Up | 0.002043892 | Mid1ip1       |
| 20682  | 4146  | 285.8129456 | 546.6537481 | 0.935556052 | 0.023050397 | Up | 0.000404428 | Sox9          |
| 269608 | 3857  | 301.4851295 | 576.6005153 | 0.935485282 | 0.021898165 | Up | 0.000332184 | Plekhg5       |
| 12894  | 4331  | 805.1298728 | 1539.09328  | 0.934878249 | 0.031065173 | Up | 0.000886543 | Cpt1a         |
| 71653  | 3803  | 315.0755977 | 601.8061451 | 0.933600815 | 0.023191052 | Up | 0.000414251 | Shtn1         |
| 94212  | 8234  | 110.8081097 | 402.2806349 | 0.932271923 | 0.038066406 | Up | 0.001426034 | Pag1          |
| 107747 | 3422  | 896.1103485 | 1709.779621 | 0.93206208  | 0.032094646 | Up | 0.000955065 | Aldh11l       |
| 19299  | 3398  | 434.0463027 | 827.1553473 | 0.930309353 | 0.021076245 | Up | 0.000307099 | Abcd3         |
| 14964  | 1736  | 497.9828304 | 948.2788147 | 0.929215304 | 0.049884917 | Up | 0.002527999 | H2-D1         |
| 20591  | 11032 | 446.7243838 | 849.6327672 | 0.927454402 | 0.017775479 | Up | 0.000133563 | Kdm5c         |
| 20450  | 5376  | 465.4805246 | 884.3484918 | 0.925894191 | 0.021442047 | Up | 0.000320507 | St8sia2       |
| 19655  | 2399  | 126.820224  | 240.8280738 | 0.92521875  | 0.020472888 | Up | 0.000269301 | Rbmx          |
| 216825 | 4442  | 578.3582272 | 1098.123943 | 0.925005637 | 0.024005571 | Up | 0.000480665 | Usp22         |
| 54411  | 2189  | 379.9237454 | 721.2770882 | 0.924843713 | 0.035605657 | Up | 0.001233998 | Atp6ap1       |
| 242523 | 4073  | 328.2309286 | 622.9584467 | 0.924424747 | 0.028277921 | Up | 0.00069689  | Dmrta1        |
| 214579 | 5647  | 157.3966782 | 298.5424976 | 0.92353122  | 0.036742861 | Up | 0.001332101 | Aldh5a1       |
| 67437  | 2885  | 749.2299527 | 1420.791673 | 0.92321455  | 0.036328559 | Up | 0.001306428 | Ssr3          |
| 19267  | 5407  | 336.2726291 | 637.3907388 | 0.922546701 | 0.021898165 | Up | 0.000332705 | Ptpre         |
| 68617  | 6772  | 489.7063951 | 927.9154453 | 0.922076312 | 0.020472888 | Up | 0.000269606 | Mtcl1         |
| 235623 | 4199  | 569.2179955 | 1078.390062 | 0.921825929 | 0.035001666 | Up | 0.00117995  | Scap          |
| 70495  | 2376  | 238.666736  | 452.151888  | 0.921809982 | 0.039354662 | Up | 0.001553763 | Atp6ap2       |
| 223255 | 2575  | 384.5765961 | 728.5000583 | 0.92165812  | 0.031024337 | Up | 0.000880419 | Stk24         |
| 108155 | 6671  | 763.4224086 | 1445.539713 | 0.921054805 | 0.017775479 | Up | 0.00013531  | Ogt           |
| 67246  | 6143  | 265.6678953 | 502.9564555 | 0.920809605 | 0.017930932 | Up | 0.000152284 | 2810474019Rik |
| 231637 | 7944  | 274.6055642 | 519.2127608 | 0.918964983 | 0.019290109 | Up | 0.00022173  | Ssh1          |
| 22793  | 2610  | 645.267305  | 1219.516878 | 0.918340893 | 0.036102861 | Up | 0.001279327 | Zyx           |
| 13384  | 4184  | 137.9195393 | 260.6405222 | 0.918234539 | 0.029800929 | Up | 0.000800533 | Mpp3          |
| 69362  | 546   | 903.396872  | 1706.60578  | 0.917698016 | 0.025675952 | Up | 0.000558967 | Cst12         |
| 66961  | 3282  | 1815.227166 | 3427.681486 | 0.91708295  | 0.024969144 | Up | 0.00052851  | Neat1         |
| 12793  | 1484  | 162.5232696 | 306.3766555 | 0.914660081 | 0.043920578 | Up | 0.001898509 | Cnih1         |
| 14218  | 10416 | 120.9476085 | 227.9784447 | 0.914515181 | 0.038951188 | Up | 0.001510933 | Sh3pxd2a      |
| 18417  | 1872  | 1305.548606 | 2459.040724 | 0.913439457 | 0.024994765 | Up | 0.000531207 | Cldn11        |
| 59095  | 1800  | 607.303565  | 1143.742663 | 0.913272745 | 0.01877924  | Up | 0.000184578 | Fxyd6         |
| 213783 | 7340  | 428.0546052 | 806.1481119 | 0.913250079 | 0.017903692 | Up | 0.000145854 | Plekhg1       |
| 26398  | 3728  | 305.8094353 | 575.391754  | 0.911911626 | 0.034404592 | Up | 0.001136092 | Map2k4        |
| 277396 | 4728  | 808.7857386 | 1521.547916 | 0.911710303 | 0.027455972 | Up | 0.000643878 | Klhl23        |
| 208111 | 5011  | 89.90413287 | 168.8100813 | 0.908941722 | 0.037248816 | Up | 0.001364035 | Zfp976        |
| 12321  | 3229  | 695.4237907 | 1305.606844 | 0.908756197 | 0.023191052 | Up | 0.000417651 | Calu          |
| 228608 | 2177  | 218.1966358 | 409.6060278 | 0.908608088 | 0.039195312 | Up | 0.001536216 | Smox          |
| 70536  | 2052  | 598.9252586 | 1123.55685  | 0.907625242 | 0.022968444 | Up | 0.000393872 | Qpct          |
| 18160  | 3653  | 1218.512235 | 2285.314499 | 0.907271982 | 0.017930932 | Up | 0.00015137  | Npr1          |
| 330662 | 6815  | 218.9568005 | 410.2165785 | 0.905739539 | 0.041416086 | Up | 0.001702443 | Dock1         |
| 20361  | 3290  | 778.3990689 | 1457.674062 | 0.905086278 | 0.033829625 | Up | 0.001087938 | Sema7a        |
| 20348  | 4956  | 294.6908259 | 549.8947124 | 0.899953266 | 0.03926696  | Up | 0.00154549  | Sema3c        |
| 67988  | 4611  | 263.2074569 | 491.0300702 | 0.899611014 | 0.039546979 | Up | 0.001578468 | Tmx3          |
| 12193  | 3537  | 198.5302371 | 370.1604658 | 0.898792066 | 0.039081901 | Up | 0.001519674 | Zfp36l2       |
| 16412  | 4194  | 903.884811  | 1685.151273 | 0.89866727  | 0.036868009 | Up | 0.001338228 | Itgb1         |
| 19328  | 2010  | 238.9144825 | 445.404267  | 0.89862107  | 0.04424094  | Up | 0.001941224 | Rab12         |
| 230514 | 1827  | 280.2026905 | 522.3554599 | 0.898561078 | 0.049167049 | Up | 0.00241628  | Leprot        |
| 14463  | 3452  | 483.5548484 | 901.2074395 | 0.898179683 | 0.046306948 | Up | 0.002157943 | Gata4         |
| 15185  | 4083  | 1251.50691  | 2332.297244 | 0.898085411 | 0.022591026 | Up | 0.000359121 | Hdac6         |
| 11975  | 3998  | 492.3716598 | 917.1828673 | 0.897461681 | 0.023044425 | Up | 0.000399651 | Atp6v0a1      |
| 68312  | 1339  | 823.9704583 | 1534.855761 | 0.897438565 | 0.047191071 | Up | 0.002233728 | Gstm7         |
| 19088  | 2749  | 183.4377204 | 341.690561  | 0.897400063 | 0.020098809 | Up | 0.000250401 | Prkar2b       |
| 103534 | 2429  | 672.5904773 | 1252.667799 | 0.897203612 | 0.029640645 | Up | 0.000778491 | Mgat4b        |
| 230810 | 3313  | 698.2735655 | 1299.932906 | 0.8965729   | 0.020012906 | Up | 0.000243948 | Slc30a2       |
| 14701  | 4219  | 514.6504964 | 957.4740081 | 0.895640305 | 0.030720673 | Up | 0.000857312 | Gng12         |
| 494448 | 5449  | 243.073676  | 451.9831035 | 0.894875178 | 0.048788649 | Up | 0.002368238 | Cbx6          |
| 18032  | 5715  | 163.1925251 | 303.405321  | 0.89467141  | 0.042804799 | Up | 0.001812058 | Nfix          |
| 76441  | 6744  | 2343.037221 | 4355.582227 | 0.894485709 | 0.010206271 | Up | 2.41E-05    | Daam2         |
| 27055  | 3011  | 483.2214261 | 898.2505595 | 0.894433504 | 0.049620513 | Up | 0.002490313 | Fkbp9         |
| 21833  | 2463  | 178.7786154 | 331.9200727 | 0.8926617   | 0.046890913 | Up | 0.002203349 | Thra          |
| 110391 | 1394  | 310.0193492 | 575.5201178 | 0.892508099 | 0.027801278 | Up | 0.000675946 | Qdpr          |
| 50799  | 3130  | 101.8442625 | 189.0600572 | 0.89247989  | 0.043257714 | Up | 0.001857129 | Slc25a13      |
| 72043  | 3674  | 506.4984459 | 939.9882353 | 0.892084858 | 0.044784075 | Up | 0.001990984 | Sulf2         |
| 22670  | 3632  | 468.9597263 | 870.1277071 | 0.891763127 | 0.017903692 | Up | 0.000144679 | Trim26        |
| 22704  | 4609  | 147.6562631 | 273.8941969 | 0.891376147 | 0.035605657 | Up | 0.001234655 | Zfp46         |
| 77519  | 6304  | 159.6232241 | 295.8190004 | 0.890044151 | 0.023757041 | Up | 0.000451882 | Zfp266        |
| 78943  | 3976  | 205.2836531 | 380.2761302 | 0.889428635 | 0.049620513 | Up | 0.002473471 | Ern1          |
| 14758  | 3869  | 637.4121161 | 1180.330314 | 0.888892305 | 0.028596161 | Up | 0.000714697 | Gpm6b         |
| 19079  | 2010  | 93.98414248 | 173.9840115 | 0.888465471 | 0.03096744  | Up | 0.000875744 | Prkab1        |
| 15510  | 2325  | 753.9990417 | 1395.773536 | 0.888430289 | 0.023867335 | Up | 0.000458491 | Hspd1         |
| 17159  | 4326  | 613.6096673 | 1135.02159  | 0.887326623 | 0.045707408 | Up | 0.002112271 | Man2b1        |
| 192231 | 3401  | 331.7030712 | 613.5040004 | 0.887180381 | 0.021898165 | Up | 0.000334812 | Hexim1        |

|          |       |             |             |             |             |    |             |           |
|----------|-------|-------------|-------------|-------------|-------------|----|-------------|-----------|
| 72144    | 4184  | 201.3519676 | 372.3374386 | 0.886891117 | 0.036328559 | Up | 0.001303867 | Slc37a3   |
| 27061    | 1267  | 246.3107176 | 455.3462645 | 0.886484644 | 0.025687043 | Up | 0.000561484 | Bcap31    |
| 1.01E+08 | 5553  | 116.5623284 | 215.2773951 | 0.885095238 | 0.036426984 | Up | 0.001314368 | Ccdc170   |
| 235406   | 4564  | 290.2806915 | 536.1062739 | 0.885070407 | 0.036328559 | Up | 0.00130925  | Snx33     |
| 73828    | 2068  | 212.5438815 | 392.4868101 | 0.884883443 | 0.032960598 | Up | 0.001025889 | Dcaf4     |
| 226791   | 1555  | 66.33316485 | 122.4724342 | 0.884654802 | 0.038827993 | Up | 0.001488727 | Lyp1a1    |
| 21351    | 1276  | 341.9654176 | 631.3491444 | 0.88458762  | 0.043172657 | Up | 0.001848103 | Taldo1    |
| 56516    | 5216  | 279.051462  | 515.0690299 | 0.884234591 | 0.029638563 | Up | 0.000775291 | Rbms2     |
| 64143    | 2293  | 404.624531  | 746.3449485 | 0.883258787 | 0.04728735  | Up | 0.002249305 | Ralb      |
| 14357    | 3715  | 521.1531515 | 961.1514642 | 0.883056398 | 0.041650578 | Up | 0.0017219   | Dtx1      |
| 268301   | 4513  | 216.5595121 | 399.1878144 | 0.882304139 | 0.016962369 | Up | 0.000123008 | Sowahc    |
| 18145    | 5209  | 115.2395588 | 212.4004051 | 0.882150475 | 0.049796388 | Up | 0.002520195 | Npc1      |
| 14661    | 3158  | 368.5905347 | 679.0678868 | 0.881536785 | 0.035605657 | Up | 0.001235615 | Glud1     |
| 225020   | 1974  | 182.4651198 | 336.0363439 | 0.880996572 | 0.038255558 | Up | 0.001447962 | Fez2      |
| 16008    | 1342  | 148.8075914 | 273.9746679 | 0.880594379 | 0.034712253 | Up | 0.001161215 | Igfbp2    |
| 228880   | 4964  | 163.2042208 | 300.4463176 | 0.880428871 | 0.045107523 | Up | 0.002030137 | Zmynd8    |
| 26465    | 2578  | 183.7177315 | 337.9385376 | 0.879270006 | 0.026332493 | Up | 0.000595963 | Zfp146    |
| 246700   | 414   | 1530.721617 | 2813.261823 | 0.878031895 | 0.044591294 | Up | 0.00197809  | Defb19    |
| 26444    | 972   | 328.8514974 | 604.3799089 | 0.878019463 | 0.039546979 | Up | 0.001571952 | Psm7      |
| 170625   | 3945  | 178.3555073 | 327.6903235 | 0.877577307 | 0.039619418 | Up | 0.001585331 | Snx18     |
| 19128    | 3314  | 507.8599972 | 932.7091311 | 0.8769964   | 0.032792895 | Up | 0.000999464 | Pros1     |
| 259302   | 8759  | 655.1468593 | 1203.205188 | 0.876992447 | 0.011863443 | Up | 3.28E-05    | Srgap3    |
| 272027   | 4259  | 190.8496357 | 350.1718601 | 0.87562672  | 0.033385695 | Up | 0.001061252 | Tstd2     |
| 11820    | 3298  | 1561.072011 | 2863.718699 | 0.875352695 | 0.023934064 | Up | 0.000464689 | App       |
| 27359    | 3504  | 320.4982676 | 587.6187775 | 0.87456394  | 0.027623379 | Up | 0.000658955 | Syt14     |
| 110695   | 2945  | 736.7695818 | 1350.247536 | 0.873938511 | 0.025687043 | Up | 0.000567521 | Aldh7a1   |
| 20973    | 1524  | 219.6086265 | 402.1714777 | 0.872876042 | 0.030204955 | Up | 0.000828139 | Syng2     |
| 235533   | 7161  | 155.0860819 | 283.9395734 | 0.872514717 | 0.031567216 | Up | 0.000926615 | Gk5       |
| 98396    | 4675  | 506.3318395 | 926.8082872 | 0.872187737 | 0.043257714 | Up | 0.001857339 | Slc41a1   |
| 384061   | 2718  | 410.099546  | 750.6424043 | 0.872151645 | 0.023594022 | Up | 0.000443452 | Fndc5     |
| 380912   | 4320  | 280.0934252 | 512.6116405 | 0.871958121 | 0.026891797 | Up | 0.000623251 | Zfp395    |
| 66950    | 4204  | 558.9095322 | 1022.756953 | 0.871776659 | 0.023867335 | Up | 0.000457603 | Tmem206   |
| 231668   | 4267  | 568.2783581 | 1039.510164 | 0.871234185 | 0.022535723 | Up | 0.000354491 | Vsig10    |
| 67017    | 3609  | 327.0020753 | 598.0750983 | 0.871026859 | 0.038831133 | Up | 0.001491509 | Fam210b   |
| 69617    | 3550  | 249.739552  | 456.7097308 | 0.870853205 | 0.033348188 | Up | 0.00104958  | Pitrm1    |
| 56464    | 1975  | 341.9638978 | 625.2729625 | 0.870642112 | 0.033385695 | Up | 0.001060769 | Ctsf      |
| 12827    | 5374  | 407.8150101 | 745.3028299 | 0.869911861 | 0.029640645 | Up | 0.000784496 | Col4a2    |
| 57810    | 7390  | 124.6063397 | 227.5881591 | 0.869048028 | 0.047191071 | Up | 0.002231582 | Cdon      |
| 110796   | 5814  | 252.6279783 | 461.2516628 | 0.868539687 | 0.043951632 | Up | 0.001903143 | Tshz1     |
| 71881    | 2190  | 163.8440694 | 299.1235812 | 0.868418196 | 0.033843391 | Up | 0.001099852 | Apm4      |
| 68262    | 1910  | 299.6842158 | 546.8477272 | 0.867696062 | 0.023464904 | Up | 0.000433955 | Apgat4    |
| 109785   | 4582  | 189.9813918 | 346.5906695 | 0.867374699 | 0.033916968 | Up | 0.001103906 | Pgm3      |
| 94089    | 3276  | 508.1153435 | 926.6645588 | 0.866891166 | 0.026681688 | Up | 0.000615369 | Trim7     |
| 15507    | 913   | 381.4935169 | 695.5339842 | 0.866462467 | 0.034948782 | Up | 0.001175154 | Hspb1     |
| 106861   | 1895  | 164.0563276 | 299.0777931 | 0.866329553 | 0.045107523 | Up | 0.002045657 | Abhd3     |
| 21425    | 2357  | 89.9769407  | 163.9767896 | 0.865864401 | 0.031706268 | Up | 0.000934909 | Tfeb      |
| 21423    | 3311  | 296.4071137 | 539.7046483 | 0.86459004  | 0.032010192 | Up | 0.00095077  | Tcf3      |
| 104776   | 3420  | 658.4575617 | 1198.262529 | 0.86378166  | 0.039195312 | Up | 0.001528841 | Aldh6a1   |
| 50790    | 5074  | 422.0574123 | 767.8025703 | 0.863296128 | 0.049017662 | Up | 0.002392029 | Acs14     |
| 72102    | 8277  | 604.8559194 | 1100.067396 | 0.862928485 | 0.01609485  | Up | 9.62E-05    | Dusp11    |
| 233210   | 6879  | 295.729468  | 537.7354468 | 0.862618567 | 0.020012906 | Up | 0.000245824 | Prr12     |
| 60599    | 5416  | 475.5723253 | 864.7396915 | 0.862601147 | 0.032960598 | Up | 0.001024719 | Trp53inp1 |
| 68539    | 2017  | 335.6073842 | 610.1049164 | 0.862282897 | 0.038827993 | Up | 0.001489715 | Tmem109   |
| 108148   | 4131  | 203.4383786 | 369.6915718 | 0.861730284 | 0.04555032  | Up | 0.002079484 | Galnt2    |
| 70737    | 5025  | 1337.354024 | 2430.062212 | 0.861611822 | 0.021041371 | Up | 0.000302577 | Cgn       |
| 16451    | 5299  | 827.2249945 | 1502.986597 | 0.861480462 | 0.038112899 | Up | 0.00143239  | Jak1      |
| 665113   | 6996  | 473.3836833 | 859.7283501 | 0.860870901 | 0.022660039 | Up | 0.000364329 | Tnik      |
| 76976    | 1540  | 143.4542238 | 260.526823  | 0.860841469 | 0.032217054 | Up | 0.000965134 | Arxes2    |
| 56484    | 6012  | 712.6068025 | 1293.131395 | 0.859690714 | 0.035477697 | Up | 0.001220468 | Foxo3     |
| 12705    | 912   | 442.2598043 | 802.4582331 | 0.859532178 | 0.032960598 | Up | 0.001018794 | Cited1    |
| 66111    | 1324  | 738.4050337 | 1339.534535 | 0.859247484 | 0.035789102 | Up | 0.001258952 | Tmed3     |
| 21429    | 4642  | 704.1188207 | 1277.320607 | 0.859229876 | 0.025603212 | Up | 0.000554072 | Ubtf      |
| 56397    | 1848  | 573.0675876 | 1039.506881 | 0.859122102 | 0.049342411 | Up | 0.002429152 | Morf4l2   |
| 110078   | 3860  | 297.6190814 | 539.8610134 | 0.859121009 | 0.035385188 | Up | 0.001215227 | Pygb      |
| 12168    | 11094 | 346.0033214 | 626.8824559 | 0.857409068 | 0.029640645 | Up | 0.000787112 | Bmpr2     |
| 107351   | 5372  | 370.1169978 | 670.0676123 | 0.856325283 | 0.032217054 | Up | 0.000965248 | Kank1     |
| 67760    | 4645  | 563.1929511 | 1018.957111 | 0.855392146 | 0.031567216 | Up | 0.000910666 | Slc38a2   |
| 53610    | 2467  | 362.0098666 | 654.6480279 | 0.85469043  | 0.046877943 | Up | 0.002200719 | Nono      |
| 54525    | 6798  | 518.21761   | 937.0100177 | 0.85450643  | 0.024658689 | Up | 0.000508419 | Syt7      |
| 246257   | 2642  | 114.0079911 | 206.0914493 | 0.854149699 | 0.015285196 | Up | 8.37E-05    | Ovca2     |
| 19652    | 1371  | 594.5801112 | 1074.777229 | 0.85409455  | 0.045077648 | Up | 0.002024465 | Rbm3      |
| 239435   | 1360  | 1910.303411 | 3450.650383 | 0.85306651  | 0.028596161 | Up | 0.000713297 | Aard      |
| 320795   | 3404  | 338.5186068 | 611.305472  | 0.852658347 | 0.04424094  | Up | 0.001943668 | Pkn1      |
| 75767    | 6874  | 455.844531  | 822.9166382 | 0.852204425 | 0.032960598 | Up | 0.001023699 | Rab11fip1 |
| 245350   | 1680  | 103.8236666 | 187.3839827 | 0.851862296 | 0.044209219 | Up | 0.001921987 | AA414768  |
| 218236   | 4919  | 669.3419477 | 1207.856474 | 0.851633698 | 0.024683086 | Up | 0.000512977 | Fam120a   |
| 68952    | 1500  | 60.8855058  | 109.8517162 | 0.851386678 | 0.040457051 | Up | 0.001637676 | Fam57b    |
| 22327    | 1601  | 111.7945517 | 201.6610023 | 0.851082239 | 0.033843391 | Up | 0.001090143 | Vbp1      |
| 20454    | 2258  | 630.6011472 | 1137.141096 | 0.850611575 | 0.028596161 | Up | 0.000718073 | St3gal5   |
| 224826   | 7696  | 444.4432805 | 801.3469365 | 0.850427665 | 0.01390321  | Up | 6.06E-05    | Ubr2      |
| 21859    | 4681  | 744.4883265 | 1341.358205 | 0.849373423 | 0.035097284 | Up | 0.001186078 | Timp3     |

|             |       |             |             |             |             |    |             |          |
|-------------|-------|-------------|-------------|-------------|-------------|----|-------------|----------|
| 20443       | 1884  | 310.8232345 | 559.869742  | 0.848996861 | 0.038827993 | Up | 0.001483782 | St3gal4  |
| 73095       | 3181  | 93.6477705  | 168.679134  | 0.848964967 | 0.02997963  | Up | 0.000816792 | Slc25a42 |
| 68682       | 3524  | 1028.293863 | 1851.766729 | 0.848649758 | 0.02612498  | Up | 0.000582325 | Slc44a2  |
| 19241       | 670   | 980.5929004 | 1764.781913 | 0.847763688 | 0.048105517 | Up | 0.002320798 | Tmsb4x   |
| 13063       | 3059  | 356.0380828 | 640.5878637 | 0.847364902 | 0.041103186 | Up | 0.001683322 | Cycs     |
| 26921       | 5668  | 887.670241  | 1596.803672 | 0.847091207 | 0.028821318 | Up | 0.000735536 | Map4k4   |
| 233115      | 7671  | 133.1355457 | 239.3159436 | 0.846020709 | 0.031872346 | Up | 0.000943928 | Dpy19l3  |
| 53860       | 3716  | 850.3208551 | 1528.148556 | 0.845705571 | 0.020155113 | Up | 0.000253192 | 9-Sep    |
| 105245      | 2670  | 697.3817028 | 1252.342131 | 0.844608332 | 0.032487054 | Up | 0.000978939 | Txndc5   |
| 18749       | 4338  | 258.5568465 | 464.2279136 | 0.844351766 | 0.043920578 | Up | 0.001895356 | Prkacb   |
| 224022      | 3264  | 617.9427133 | 1109.117801 | 0.8438676   | 0.042811427 | Up | 0.001825253 | Slc7a4   |
| 70599       | 5109  | 551.7777994 | 989.6495395 | 0.842830309 | 0.031575032 | Up | 0.000929678 | Ssfa2    |
| 17250       | 5959  | 969.5556174 | 1738.792747 | 0.842690419 | 0.020859299 | Up | 0.000293397 | Abcc1    |
| 66082       | 2065  | 246.7382169 | 442.3400122 | 0.842174558 | 0.039354662 | Up | 0.001557271 | Abhd6    |
| 208211      | 1772  | 220.9031429 | 395.8995482 | 0.841720476 | 0.04948401  | Up | 0.002442427 | Alg1     |
| 15531       | 7826  | 494.3751737 | 886.0110652 | 0.84171842  | 0.027528027 | Up | 0.000646755 | Ndst1    |
| 53332       | 4636  | 321.1590959 | 575.3556101 | 0.841165761 | 0.02104232  | Up | 0.000305697 | Mttr1    |
| 232174      | 5086  | 683.6855236 | 1224.36448  | 0.840628314 | 0.019171768 | Up | 0.000197285 | Cyp26b1  |
| 246277      | 2477  | 133.2121147 | 238.5128441 | 0.840341667 | 0.035789102 | Up | 0.001254228 | Csad     |
| 217038      | 2490  | 85.24483017 | 152.5863454 | 0.839941617 | 0.044209219 | Up | 0.001926753 | Mrm1     |
| 72459       | 2801  | 538.1752003 | 963.179305  | 0.839728483 | 0.042811427 | Up | 0.001825258 | Htatsf1  |
| 14009       | 4146  | 76.80297041 | 137.4220473 | 0.839379467 | 0.040719473 | Up | 0.001659234 | Etv1     |
| 67043       | 2316  | 495.7607579 | 886.9574983 | 0.839220895 | 0.045691225 | Up | 0.002100544 | Syap1    |
| 20663       | 5813  | 321.1225593 | 574.4670957 | 0.839100241 | 0.026243911 | Up | 0.000591696 | Sos2     |
| 70784       | 2411  | 101.7309185 | 181.9737626 | 0.838972238 | 0.047055195 | Up | 0.00221914  | Rasl12   |
| 94275       | 2752  | 2980.650571 | 5330.440514 | 0.83862751  | 0.024683086 | Up | 0.000515424 | Maged1   |
| 98733       | 7310  | 976.1202955 | 1744.97569  | 0.838076079 | 0.018393264 | Up | 0.000171984 | Obsl1    |
| 20360       | 3976  | 836.540283  | 1494.628658 | 0.837280171 | 0.023191052 | Up | 0.000419119 | Sema6c   |
| 382207      | 4903  | 550.1811065 | 982.6378362 | 0.836753193 | 0.023191052 | Up | 0.000420617 | Jade3    |
| 67247       | 1883  | 409.8119053 | 731.1578351 | 0.835220978 | 0.041992181 | Up | 0.001750504 | 2-Mar    |
| 26943       | 3694  | 7071.182296 | 12612.0136  | 0.834775273 | 0.046643947 | Up | 0.002181695 | Serinc3  |
| 20286       | 5843  | 1629.098511 | 2900.55329  | 0.83225428  | 0.023594022 | Up | 0.0004434   | Zc3h7b   |
| 330914      | 10717 | 609.494963  | 1084.595967 | 0.831471508 | 0.02099543  | Up | 0.000298681 | Arhgap32 |
| 107375      | 1935  | 227.5657092 | 404.8375818 | 0.831060043 | 0.033356611 | Up | 0.001055471 | Slc25a45 |
| 99382       | 4595  | 301.2753016 | 535.9085402 | 0.830904401 | 0.042811427 | Up | 0.001818576 | Abtb2    |
| 12988       | 2772  | 271.3721462 | 482.5670707 | 0.830456823 | 0.042481619 | Up | 0.00178922  | Csk      |
| 16784       | 2281  | 918.2706643 | 1632.231015 | 0.829853899 | 0.035258064 | Up | 0.0012041   | Lamp2    |
| 76130       | 2818  | 222.9073204 | 396.2180687 | 0.829850677 | 0.035258064 | Up | 0.001205313 | Las1l    |
| 12418       | 5213  | 173.008921  | 307.4838497 | 0.829664205 | 0.028876349 | Up | 0.000742745 | Cbx4     |
| 320292      | 2995  | 136.0948193 | 241.8052996 | 0.829233715 | 0.031510965 | Up | 0.000904699 | Rasgef1b |
| 20677       | 2969  | 118.8580266 | 211.1311417 | 0.828900058 | 0.035756734 | Up | 0.001245763 | Sox4     |
| 14229       | 4006  | 931.7594182 | 1654.174175 | 0.828081748 | 0.037963609 | Up | 0.001413523 | Fkbp5    |
| 11836       | 2104  | 234.4311237 | 415.9926499 | 0.827393919 | 0.037791241 | Up | 0.001399434 | Araf     |
| 211586      | 7456  | 502.3744267 | 891.2049373 | 0.826994199 | 0.038951188 | Up | 0.001511233 | Tfdp2    |
| 229003      | 10124 | 84.72628418 | 150.2233806 | 0.826272866 | 0.028277921 | Up | 0.000698506 | Helz2    |
| 54667       | 5597  | 886.0006725 | 1570.884602 | 0.826197504 | 0.032960598 | Up | 0.001024598 | Atp8b2   |
| 380698      | 24025 | 82.99511493 | 147.0929208 | 0.825629488 | 0.028596161 | Up | 0.000711306 | Obscn    |
| 20564       | 5017  | 248.1154787 | 439.1893026 | 0.823831174 | 0.039195312 | Up | 0.001527942 | Slit3    |
| 330814      | 8288  | 1779.894072 | 3149.93304  | 0.823529777 | 0.016828865 | Up | 0.000118123 | Adgr1l   |
| 99889       | 2942  | 169.0690279 | 299.1206655 | 0.823115193 | 0.036051367 | Up | 0.001271286 | Arfp1    |
| 245631      | 4520  | 1200.134373 | 2122.651693 | 0.822671712 | 0.025687043 | Up | 0.000568667 | Mum11    |
| 243725      | 10287 | 1001.056713 | 1770.087657 | 0.822297096 | 0.01353896  | Up | 5.72E-05    | Ppp1r9a  |
| 18617       | 869   | 154.0904382 | 272.430845  | 0.822112716 | 0.033843391 | Up | 0.001093054 | Rhox5    |
| 243382      | 5616  | 93.88920816 | 165.9779885 | 0.821960683 | 0.049620513 | Up | 0.002491045 | Ppm1k    |
| 240444      | 2882  | 78.78900888 | 139.2668089 | 0.821785173 | 0.027623379 | Up | 0.000656578 | Kcng2    |
| 65960       | 4071  | 305.6335853 | 539.9779196 | 0.821097329 | 0.046306948 | Up | 0.002150362 | Twsg1    |
| 11518       | 3988  | 857.1819601 | 1513.986183 | 0.820678646 | 0.037279504 | Up | 0.001370842 | Add1     |
| 219151      | 3405  | 111.4403531 | 196.8036727 | 0.820485411 | 0.044263283 | Up | 0.001948218 | Scara3   |
| 80884       | 2114  | 534.8712732 | 943.6836687 | 0.819111615 | 0.021898165 | Up | 0.000337669 | Maged2   |
| 56442       | 2889  | 846.3059952 | 1492.36484  | 0.818348984 | 0.049167049 | Up | 0.002415046 | Serinc1  |
| 11502       | 4046  | 465.0763767 | 819.9540576 | 0.818075416 | 0.035383393 | Up | 0.001212648 | Adam9    |
| 231050      | 2541  | 131.8915916 | 232.5166262 | 0.817981288 | 0.033013364 | Up | 0.001030378 | Galnt11  |
| 71778       | 3591  | 429.8971645 | 757.6700635 | 0.817578152 | 0.019290109 | Up | 0.000208714 | Klhl5    |
| 22337       | 4354  | 198.9571531 | 350.1737469 | 0.815613157 | 0.027754492 | Up | 0.000672075 | Vdr      |
| 12488       | 5420  | 702.3832802 | 1233.5644   | 0.812502628 | 0.039614604 | Up | 0.001583081 | Cd2ap    |
| 108156      | 3324  | 140.9703315 | 247.5577259 | 0.812373408 | 0.031024337 | Up | 0.000881366 | Mthfd1   |
| 54610       | 4451  | 407.8674549 | 715.5663078 | 0.810985066 | 0.032792895 | Up | 0.000995608 | Tbc1d8   |
| 12568       | 2160  | 414.0814507 | 726.3404616 | 0.810731373 | 0.041958813 | Up | 0.001747304 | Cdk5     |
| 71967       | 1751  | 288.7769221 | 506.2797981 | 0.809979466 | 0.036468422 | Up | 0.001317435 | Mageb16  |
| 228026      | 5202  | 303.1112137 | 531.1926631 | 0.809387994 | 0.043920578 | Up | 0.001899053 | Pdk1     |
| 76932       | 3277  | 180.7322872 | 316.6533977 | 0.809050298 | 0.028667338 | Up | 0.000726663 | Arfp2    |
| 279706      | 1728  | 242.9598928 | 425.6475034 | 0.808940992 | 0.030884535 | Up | 0.000870737 | Nup62cl  |
| 109624      | 3968  | 303.2228208 | 530.5516954 | 0.807114994 | 0.042493831 | Up | 0.001791566 | Cald1    |
| 11539       | 5239  | 1058.748367 | 1852.495767 | 0.807110502 | 0.036140693 | Up | 0.001284749 | Adora1   |
| 71529       | 4148  | 218.2707235 | 381.7851554 | 0.806642373 | 0.049557727 | Up | 0.002456883 | Kazn     |
| 12521       | 1823  | 267.6945066 | 468.1570918 | 0.806405179 | 0.019290109 | Up | 0.000224588 | Cd82     |
| 64294       | 2024  | 1198.749267 | 2096.403989 | 0.806386826 | 0.044392823 | Up | 0.001959067 | Itm2c    |
| 74772       | 4302  | 840.8381005 | 1470.347434 | 0.806257147 | 0.042697432 | Up | 0.001803832 | Atp13a2  |
| 240028      | 5181  | 289.8045198 | 506.6744429 | 0.805978964 | 0.0288274   | Up | 0.00073696  | Lnpep    |
| 52857       | 3146  | 437.7878781 | 765.282351  | 0.80576012  | 0.023867335 | Up | 0.000458888 | Gramd1a  |
| BGI_novel_1 | 10068 | 188.4993409 | 329.2943794 | 0.804818408 | 0.048105517 | Up | 0.002319273 | NA       |

|        |       |             |             |             |             |    |             |               |
|--------|-------|-------------|-------------|-------------|-------------|----|-------------|---------------|
| 666704 | 2071  | 140.0864985 | 244.4468648 | 0.803202985 | 0.037248816 | Up | 0.001354299 | Samd1         |
| 666938 | 7708  | 750.6184277 | 1308.601945 | 0.801874706 | 0.04501294  | Up | 0.002013492 | Bend4         |
| 76484  | 5525  | 254.9157011 | 444.2662786 | 0.801404403 | 0.023191052 | Up | 0.000417559 | Kncd1         |
| 19230  | 2973  | 508.9012073 | 886.857496  | 0.801316691 | 0.049620513 | Up | 0.002468838 | Twf1          |
| 93681  | 8749  | 169.0319133 | 294.5578223 | 0.801255212 | 0.035258064 | Up | 0.001197831 | Zkscan8       |
| 70461  | 5110  | 321.5879406 | 560.0054801 | 0.800227638 | 0.033829625 | Up | 0.001085932 | Crtc3         |
| 19266  | 9629  | 272.3306466 | 473.9961566 | 0.799516016 | 0.027754492 | Up | 0.000669332 | Ptprd         |
| 71145  | 3794  | 839.7749297 | 1461.472383 | 0.799347943 | 0.017243156 | Up | 0.000126388 | Scara5        |
| 69847  | 4155  | 384.0146167 | 668.3054305 | 0.799346372 | 0.028821318 | Up | 0.000734896 | Wnk4          |
| 331401 | 7631  | 464.2221292 | 807.3973524 | 0.798463559 | 0.029999551 | Up | 0.000819921 | Thoc2         |
| 16573  | 6030  | 873.9989451 | 1516.936685 | 0.795457427 | 0.030720673 | Up | 0.000851582 | Kif5b         |
| 228140 | 5821  | 232.4105578 | 403.284096  | 0.795120904 | 0.04728735  | Up | 0.002248375 | Tnks1bp1      |
| 78521  | 4691  | 304.5328866 | 528.2665136 | 0.794667928 | 0.035789102 | Up | 0.001250788 | B230219D22Rik |
| 26416  | 3418  | 268.9600659 | 466.010077  | 0.792969169 | 0.042288518 | Up | 0.001768326 | Mapk14        |
| 216810 | 4802  | 626.3207681 | 1083.430217 | 0.790632611 | 0.02969684  | Up | 0.000789884 | Tom1l2        |
| 545156 | 3553  | 204.7693542 | 354.2086586 | 0.790599661 | 0.040417021 | Up | 0.001634313 | Kalrn         |
| 18679  | 5505  | 126.0695985 | 217.8819909 | 0.789326541 | 0.04728735  | Up | 0.002257793 | Phka1         |
| 56526  | 3786  | 689.6241253 | 1191.797229 | 0.789256648 | 0.024005571 | Up | 0.000479281 | 6-Sep         |
| 67905  | 1844  | 424.2547644 | 732.832631  | 0.788552883 | 0.035756734 | Up | 0.00124346  | Ppm1m         |
| 22127  | 842   | 376.8534213 | 650.3321671 | 0.787173295 | 0.030720673 | Up | 0.000858697 | Tsx           |
| 12913  | 1582  | 420.3717005 | 725.3594299 | 0.787030506 | 0.046839096 | Up | 0.002196876 | Creb3         |
| 668661 | 2463  | 644.0665477 | 1110.494338 | 0.78592037  | 0.024005571 | Up | 0.000478262 | 2410002F23Rik |
| 432731 | 4888  | 337.4796175 | 580.8261509 | 0.783306039 | 0.049620513 | Up | 0.002502994 | Zscan26       |
| 52592  | 2503  | 222.0240769 | 382.1166357 | 0.783296933 | 0.049620513 | Up | 0.002502495 | Brms1l        |
| 22431  | 2724  | 627.2450612 | 1078.212565 | 0.781540516 | 0.038112899 | Up | 0.001431717 | Wt1           |
| 231670 | 3913  | 1394.323974 | 2396.548595 | 0.78139238  | 0.024744639 | Up | 0.000518425 | Fbxo21        |
| 14269  | 6750  | 400.0700702 | 687.6357391 | 0.781391827 | 0.021898165 | Up | 0.000337955 | Fnbp1         |
| 64652  | 5606  | 1008.827002 | 1732.276771 | 0.779990656 | 0.019290109 | Up | 0.000215304 | Nisch         |
| 12371  | 3899  | 179.7930815 | 308.6757849 | 0.779754804 | 0.020677778 | Up | 0.000279004 | Casp9         |
| 320706 | 13232 | 703.0263068 | 1206.632211 | 0.77933542  | 0.020313741 | Up | 0.000260394 | Soga1         |
| 14360  | 3537  | 687.9635935 | 1180.513895 | 0.779010896 | 0.029640645 | Up | 0.000782109 | Fyn           |
| 329324 | 7896  | 99.08497095 | 170.0045942 | 0.778835581 | 0.037679028 | Up | 0.001392833 | Syt14         |
| 20729  | 4454  | 631.9818717 | 1084.201969 | 0.778678452 | 0.047055195 | Up | 0.002219183 | Spin1         |
| 233765 | 5005  | 184.3705111 | 316.114806  | 0.777840685 | 0.045348731 | Up | 0.002062461 | Plekha7       |
| 28109  | 3535  | 325.7952212 | 558.3312516 | 0.777155868 | 0.04008404  | Up | 0.001614002 | D10Wsu102e    |
| 230676 | 10988 | 522.1708319 | 894.3332722 | 0.776290678 | 0.017959615 | Up | 0.000161454 | Szt2          |
| 75547  | 10663 | 546.4754358 | 935.891649  | 0.776184866 | 0.041831776 | Up | 0.001735262 | Akap13        |
| 67912  | 2588  | 166.4354856 | 285.0347606 | 0.776174807 | 0.049620513 | Up | 0.002501709 | 1600012H06Rik |
| 18744  | 2629  | 1615.375887 | 2760.564827 | 0.773093571 | 0.044392823 | Up | 0.001959661 | Pja1          |
| 279561 | 10262 | 566.1068506 | 967.2909841 | 0.77287557  | 0.032960598 | Up | 0.001021432 | Wnk3          |
| 16796  | 3433  | 783.8133482 | 1338.458496 | 0.771990356 | 0.038857226 | Up | 0.001494187 | Lasp1         |
| 18477  | 1417  | 1169.708867 | 1995.564109 | 0.77064713  | 0.045691225 | Up | 0.002108205 | Prdx1         |
| 14667  | 4257  | 4829.370327 | 8238.375148 | 0.770524726 | 0.044784075 | Up | 0.001992377 | Gm2a          |
| 66855  | 2948  | 906.8547436 | 1546.945702 | 0.77047917  | 0.02476866  | Up | 0.000521063 | Tcf25         |
| 231327 | 4008  | 245.2392482 | 418.3101319 | 0.770383055 | 0.035097284 | Up | 0.0011862   | Ppat          |
| 231549 | 3805  | 401.7978677 | 685.3048693 | 0.77027603  | 0.023191052 | Up | 0.000421858 | Lrrc8d        |
| 235542 | 6285  | 260.2443964 | 443.7926952 | 0.770018822 | 0.038951188 | Up | 0.001509965 | Ppp2r3a       |
| 215748 | 3430  | 239.7949646 | 408.504399  | 0.76855025  | 0.032960598 | Up | 0.001024159 | Cnksr3        |
| 269424 | 5551  | 532.2363666 | 906.118336  | 0.767632383 | 0.036140693 | Up | 0.001285342 | Jade1         |
| 74493  | 6461  | 823.4755724 | 1401.822551 | 0.767505979 | 0.030720673 | Up | 0.00085463  | Tnks2         |
| 22142  | 1597  | 1710.013085 | 2909.936941 | 0.766980525 | 0.040719473 | Up | 0.001660586 | Tuba1a        |
| 51789  | 4515  | 559.4510577 | 951.9974069 | 0.766945718 | 0.027587111 | Up | 0.000651711 | Tnk2          |
| 13039  | 3509  | 5380.813487 | 9137.915417 | 0.764040788 | 0.047431598 | Up | 0.002277829 | Ctsl          |
| 207565 | 4848  | 728.9917746 | 1237.32983  | 0.763255684 | 0.033255219 | Up | 0.001041095 | Camkk2        |
| 64297  | 4585  | 787.6079244 | 1335.739917 | 0.762089595 | 0.028647059 | Up | 0.000724914 | Gprc5b        |
| 19349  | 2175  | 748.4142969 | 1269.07571  | 0.761869116 | 0.042747251 | Up | 0.001807779 | Rab7          |
| 140742 | 2798  | 471.8204245 | 799.2017836 | 0.760321931 | 0.049620513 | Up | 0.002502726 | Sesn1         |
| 232944 | 2259  | 412.4009046 | 698.2897632 | 0.759778326 | 0.034477571 | Up | 0.001139988 | Mark4         |
| 50767  | 4478  | 189.9844145 | 321.6032187 | 0.759400775 | 0.049017662 | Up | 0.002389859 | Pnplp6        |
| 213332 | 5877  | 224.320331  | 379.4604905 | 0.758389297 | 0.03619705  | Up | 0.001290286 | Mfsd4b4       |
| 11987  | 7197  | 769.9632774 | 1301.908701 | 0.757766735 | 0.035756734 | Up | 0.001247023 | Sic7a1        |
| 18844  | 8819  | 1382.982958 | 2335.790228 | 0.756127336 | 0.019290109 | Up | 0.000216686 | Plxna1        |
| 15354  | 1638  | 439.2725396 | 741.7165838 | 0.755751711 | 0.032707533 | Up | 0.000991223 | Hmgb3         |
| 98952  | 4516  | 1252.102788 | 2113.669412 | 0.755396749 | 0.037982446 | Up | 0.001421251 | Fam102a       |
| 14190  | 3769  | 529.5456112 | 892.3380848 | 0.752835462 | 0.04424094  | Up | 0.001939011 | Fgl2          |
| 58800  | 7144  | 567.0045987 | 954.0869234 | 0.750760275 | 0.032205644 | Up | 0.000962129 | Trpm7         |
| 77781  | 7273  | 384.3994493 | 646.5933983 | 0.750252508 | 0.035789102 | Up | 0.001258839 | Epm2aip1      |
| 11732  | 3511  | 258.3427189 | 433.6002295 | 0.747079297 | 0.036277926 | Up | 0.001297836 | Ank           |
| 17289  | 6800  | 616.5639755 | 1034.631328 | 0.746794278 | 0.038987999 | Up | 0.001514342 | Mertk         |
| 52250  | 3815  | 1583.05426  | 2655.552119 | 0.74630114  | 0.037405547 | Up | 0.001377089 | Reep1         |
| 211347 | 7365  | 702.6167684 | 1177.036721 | 0.744349417 | 0.045052642 | Up | 0.002019862 | Pank3         |
| 110542 | 1947  | 3583.363174 | 5992.929104 | 0.741947039 | 0.045918423 | Up | 0.002124002 | Amhr2         |
| 231051 | 12623 | 861.1424544 | 1438.120047 | 0.73986029  | 0.016201681 | Up | 9.99E-05    | Kmt2c         |
| 14456  | 2594  | 1289.328247 | 2152.534761 | 0.739416932 | 0.036328559 | Up | 0.001307864 | Gas6          |
| 67092  | 2357  | 1910.667579 | 3189.650435 | 0.739321525 | 0.033348188 | Up | 0.001050891 | Gatm          |
| 320011 | 9119  | 676.3889303 | 1125.667143 | 0.734855335 | 0.036328559 | Up | 0.001305212 | Uggt1         |
| 13819  | 5352  | 623.4865257 | 1037.153961 | 0.734199785 | 0.03315646  | Up | 0.001036273 | Epas1         |
| 433855 | 2849  | 1262.100551 | 2098.275344 | 0.733377153 | 0.027628922 | Up | 0.00066174  | Al506816      |
| 16511  | 4114  | 446.0509856 | 740.607872  | 0.731501258 | 0.041831776 | Up | 0.00173767  | Kcnh2         |
| 74315  | 3633  | 367.6018229 | 610.0086577 | 0.730685798 | 0.030720673 | Up | 0.000860761 | Rnf145        |
| 23992  | 1554  | 360.8917468 | 598.0967761 | 0.72881279  | 0.049620513 | Up | 0.002479259 | Prkra         |

|             |       |             |             |              |             |      |             |               |
|-------------|-------|-------------|-------------|--------------|-------------|------|-------------|---------------|
| 209446      | 3160  | 384.5550689 | 637.0517547 | 0.728220374  | 0.049017662 | Up   | 0.002383586 | Tfe3          |
| 72949       | 4825  | 379.6916737 | 628.8590636 | 0.727908362  | 0.016828865 | Up   | 0.000114588 | Ccnt2         |
| 69504       | 4363  | 239.0177141 | 395.1506007 | 0.725285058  | 0.029800929 | Up   | 0.000802638 | Zfp932        |
| 208890      | 5050  | 294.4544649 | 486.2274704 | 0.723586854  | 0.045107523 | Up   | 0.002038281 | Slc26a7       |
| BGI_novel_1 | 3237  | 151.1152408 | 249.5225316 | 0.723520923  | 0.033255219 | Up   | 0.001042227 | NA            |
| 72739       | 4634  | 389.4137526 | 642.8785381 | 0.723242353  | 0.02997963  | Up   | 0.000816147 | Zkscan3       |
| 225579      | 2598  | 291.0654519 | 480.1708923 | 0.722204342  | 0.041103186 | Up   | 0.001682635 | Slc27a6       |
| 17920       | 7856  | 578.0343034 | 952.7758622 | 0.720981752  | 0.039209834 | Up   | 0.001541551 | Myo6          |
| 72193       | 7779  | 602.6929523 | 992.9838235 | 0.720347021  | 0.038150584 | Up   | 0.001439947 | Scaf11        |
| 72823       | 8409  | 169.3205974 | 278.5722438 | 0.718294035  | 0.033413875 | Up   | 0.001064485 | Pard3b        |
| 102098      | 5300  | 362.174795  | 595.8260143 | 0.718204967  | 0.043106975 | Up   | 0.001843433 | Arhgef18      |
| 11614       | 1811  | 273.4991545 | 447.5996236 | 0.71067245   | 0.04619093  | Up   | 0.002140589 | Nr0b1         |
| 72611       | 3849  | 270.3575978 | 441.8883713 | 0.708813065  | 0.04424094  | Up   | 0.001943863 | Zfp655        |
| 16324       | 4255  | 569.9178362 | 930.1403099 | 0.706694416  | 0.039268924 | Up   | 0.00154726  | Inhbb         |
| 223723      | 3770  | 269.0667283 | 438.6289666 | 0.705037085  | 0.049620513 | Up   | 0.002500041 | Ttll12        |
| 320267      | 3321  | 245.8444807 | 400.088752  | 0.702574103  | 0.021898165 | Up   | 0.000337884 | Fubp3         |
| 228359      | 2973  | 459.2668669 | 747.0249397 | 0.701823702  | 0.03964374  | Up   | 0.001589373 | Arhgap1       |
| 13002       | 4350  | 656.3241103 | 1067.350265 | 0.701553356  | 0.038150584 | Up   | 0.001441905 | Dnajc5        |
| 83674       | 4767  | 184.7016215 | 300.2100771 | 0.700775873  | 0.048039718 | Up   | 0.002313246 | Cnmn1         |
| 15481       | 2104  | 3838.931974 | 6238.401098 | 0.700471318  | 0.038951188 | Up   | 0.001504362 | Hspa8         |
| 1.01E+08    | 9672  | 450.841412  | 731.9923577 | 0.699208546  | 0.04297249  | Up   | 0.001835786 | Epg5          |
| 107272      | 2188  | 352.6565743 | 572.2405361 | 0.698357763  | 0.040704366 | Up   | 0.001652951 | Psat1         |
| 406217      | 784   | 242.8125494 | 393.6751371 | 0.697162614  | 0.049620513 | Up   | 0.00249706  | Bex4          |
| 26457       | 3431  | 810.1401269 | 1311.373823 | 0.694835629  | 0.033843391 | Up   | 0.001099141 | Slc27a1       |
| 241915      | 11013 | 527.9277292 | 854.0654126 | 0.694006124  | 0.047474195 | Up   | 0.002281921 | Phc3          |
| 16897       | 4415  | 406.7827705 | 657.9889534 | 0.693804789  | 0.038951188 | Up   | 0.001507943 | Llg1          |
| 74318       | 1114  | 128.4435203 | 207.5570118 | 0.692373559  | 0.046306948 | Up   | 0.002155652 | Hopx          |
| 268932      | 7092  | 543.381117  | 877.8848347 | 0.692067261  | 0.049557727 | Up   | 0.002458979 | Caskin1       |
| 69632       | 10740 | 943.6757467 | 1523.805141 | 0.691315298  | 0.048788649 | Up   | 0.002366394 | Arhgef12      |
| 103583      | 4261  | 450.2730104 | 726.7485845 | 0.690656352  | 0.049017662 | Up   | 0.002398008 | Fbxw11        |
| 70354       | 6795  | 485.3267257 | 783.2059329 | 0.690435386  | 0.044209219 | Up   | 0.00192739  | Secisbp2l     |
| 74164       | 5808  | 1077.556768 | 1736.581868 | 0.68848655   | 0.049620513 | Up   | 0.002505448 | Nfx1          |
| 217866      | 6718  | 1360.924683 | 2185.70613  | 0.683512216  | 0.041416086 | Up   | 0.001702313 | Cdc42bpb      |
| 106529      | 1235  | 641.869501  | 1029.901853 | 0.682154941  | 0.030562952 | Up   | 0.000841907 | Tecr          |
| 228545      | 4054  | 408.8695713 | 654.2809015 | 0.678269459  | 0.045691225 | Up   | 0.002103387 | Vps18         |
| 51792       | 2256  | 566.228925  | 905.6188271 | 0.677518502  | 0.043951632 | Up   | 0.001904185 | Ppp2r1a       |
| 14104       | 9938  | 2118.425024 | 3377.857228 | 0.673116282  | 0.045107523 | Up   | 0.002041933 | Fasn          |
| 18023       | 4354  | 1492.758057 | 2373.773755 | 0.669202083  | 0.049620513 | Up   | 0.00248814  | Nfe2l1        |
| 54446       | 13331 | 1622.202859 | 2576.827543 | 0.667641745  | 0.019290109 | Up   | 0.000205908 | Nfat5         |
| 72141       | 3170  | 247.0780367 | 391.5370606 | 0.664182099  | 0.034643284 | Up   | 0.001148693 | Adpgk         |
| 78455       | 11620 | 1487.943236 | 2351.220496 | 0.660090351  | 0.041736202 | Up   | 0.001727239 | Helz          |
| 17880       | 5340  | 622.1266749 | 982.8290081 | 0.659732073  | 0.043879128 | Up   | 0.001891586 | Myh11         |
| 320878      | 6564  | 458.6178018 | 724.5142742 | 0.659721758  | 0.04424094  | Up   | 0.001943388 | Mical2        |
| 20535       | 4223  | 844.9085868 | 1333.47319  | 0.658321654  | 0.039354662 | Up   | 0.001554616 | Slc4a2        |
| 12829       | 10158 | 478.2506881 | 754.1456705 | 0.657076177  | 0.023206472 | Up   | 0.000424173 | Col4a4        |
| 17330       | 2619  | 374.6587974 | 588.8422439 | 0.652303847  | 0.031065173 | Up   | 0.000885944 | Minpp1        |
| 75352       | 1620  | 439.5229829 | 688.8266134 | 0.648202277  | 0.045077648 | Up   | 0.00202487  | 4930550L24Rik |
| 11426       | 15468 | 2833.49666  | 4430.612662 | 0.644922706  | 0.049636559 | Up   | 0.002509966 | Macf1         |
| 11305       | 8094  | 460.2884194 | 718.413023  | 0.642275357  | 0.037248816 | Up   | 0.001357824 | Abca2         |
| 108089      | 5397  | 587.2761408 | 914.209078  | 0.638485118  | 0.033461705 | Up   | 0.001067451 | Rnf144a       |
| 102209      | 1503  | 209.2080701 | 324.8948343 | 0.635034301  | 0.030720673 | Up   | 0.000863464 | Snapc2        |
| 17909       | 7173  | 1047.986792 | 1619.906651 | 0.628290144  | 0.044144165 | Up   | 0.001916333 | Myo10         |
| 319565      | 16785 | 2952.402436 | 4554.121168 | 0.625283291  | 0.044896177 | Up   | 0.002001235 | Syne2         |
| 105439      | 2269  | 293.5766393 | 452.6756141 | 0.624740416  | 0.032960598 | Up   | 0.001013254 | Slain1        |
| 78757       | 9339  | 589.1107135 | 905.8302377 | 0.620701909  | 0.01609485  | Up   | 9.75E-05    | Rictor        |
| 68744       | 4098  | 349.775793  | 535.3849838 | 0.614146228  | 0.044591294 | Up   | 0.001979956 | Zfp740        |
| 319277      | 5863  | 263.5393416 | 402.9444    | 0.612562437  | 0.049557727 | Up   | 0.002452601 | A230046K03Rik |
| 67839       | 4087  | 500.5770001 | 761.584833  | 0.605412742  | 0.042307773 | Up   | 0.00177436  | Gpsm1         |
| 56364       | 5320  | 1135.971597 | 1727.511495 | 0.604768547  | 0.044528669 | Up   | 0.001969497 | Zymn3         |
| 223922      | 7244  | 564.4831939 | 851.4039629 | 0.592913176  | 0.04555032  | Up   | 0.00207931  | Atf7          |
| 50796       | 2251  | 318.9260282 | 480.3384267 | 0.590829384  | 0.027628922 | Up   | 0.000662227 | Dmrt1         |
| 218271      | 2317  | 235.6950653 | 354.5029455 | 0.588876061  | 0.048239792 | Up   | 0.002335357 | B4galt7       |
| 12009       | 3589  | 1265.921603 | 842.2687418 | -0.587835532 | 0.030720673 | Down | 0.000863468 | Cep131        |
| 93834       | 2632  | 2842.457794 | 1888.173098 | -0.590147897 | 0.001326263 | Down | 5.72E-07    | Peli2         |
| 70544       | 1361  | 1457.540769 | 954.5386005 | -0.610660793 | 0.004898185 | Down | 6.60E-06    | Tmem242       |
| BGI_novel_1 | 5149  | 586.00963   | 383.4069112 | -0.61204803  | 0.030720673 | Down | 0.000854134 | NA            |
| 67081       | 1336  | 430.6117475 | 277.5311599 | -0.633737918 | 0.042811427 | Down | 0.001819298 | 1700025F24Rik |
| 236082      | 2347  | 1188.293524 | 755.5651888 | -0.653263106 | 0.037963609 | Down | 0.001415402 | Dhrsx         |
| 66479       | 1132  | 8472.869163 | 5378.355514 | -0.65568547  | 1.58E-05    | Down | 3.41E-09    | 1700029F12Rik |
| 65020       | 3549  | 3547.132323 | 2247.9386   | -0.658050519 | 0.004710536 | Down | 4.06E-06    | Zfp110        |
| 1E+08       | 787   | 17282.82517 | 10938.56092 | -0.65991612  | 0.029198712 | Down | 0.000757754 | Gm3417        |
| BGI_novel_1 | 10391 | 1396.501987 | 876.8389196 | -0.671433886 | 0.034772702 | Down | 0.001166235 | NA            |
| 214901      | 3230  | 413.5312554 | 259.4728772 | -0.672412634 | 0.011836229 | Down | 3.21E-05    | Chtf18        |
| 232878      | 3147  | 465.2425694 | 290.6490907 | -0.678704713 | 0.01353896  | Down | 4.23E-05    | Zscan22       |
| 214669      | 2838  | 1070.336869 | 666.4820275 | -0.683427054 | 0.000411818 | Down | 1.60E-07    | L3mbtl2       |
| 21648       | 791   | 14751.70813 | 8815.313713 | -0.7427982   | 0.022968444 | Down | 0.000389652 | Dynl1b        |
| 73090       | 879   | 471.0857805 | 281.2859897 | -0.743952089 | 0.01353896  | Down | 5.30E-05    | 2900092C05Rik |
| BGI_novel_1 | 17940 | 1106.65652  | 656.8260542 | -0.752624253 | 0.019312244 | Down | 0.000228325 | NA            |
| BGI_novel_1 | 3610  | 301.9237686 | 170.7411899 | -0.822373197 | 0.017847561 | Down | 0.000138015 | NA            |
| 73961       | 935   | 89.48933891 | 46.40484264 | -0.947440453 | 0.040704366 | Down | 0.001651681 | 4930447J18Rik |
| BGI_novel_1 | 4388  | 131.3324711 | 67.4456469  | -0.96142642  | 0.023934064 | Down | 0.000463545 | NA            |

|             |      |             |             |              |             |      |             |               |
|-------------|------|-------------|-------------|--------------|-------------|------|-------------|---------------|
| BGI_novel_1 | 1298 | 100.6536718 | 51.40714347 | -0.969359049 | 0.026378819 | Down | 0.000601944 | NA            |
| 1E+08       | 1999 | 92.12632831 | 43.74278723 | -1.074568366 | 0.027181793 | Down | 0.000633933 | Gm15023       |
| BGI_novel_1 | 2233 | 87.13415637 | 36.36839199 | -1.260553223 | 0.0159523   | Down | 9.01E-05    | NA            |
| BGI_novel_1 | 2385 | 59.13764791 | 24.16024439 | -1.291441816 | 0.023934064 | Down | 0.000466362 | NA            |
| 11870       | 1417 | 83.05626577 | 32.54827266 | -1.351508028 | 0.017851899 | Down | 0.000141124 | Art1          |
| 1E+08       | 1960 | 61.6751312  | 20.35938763 | -1.598994711 | 0.031567216 | Down | 0.000926644 | Gm2913        |
| 1.01E+08    | 646  | 14.15216285 | 4.575308542 | -1.629081613 | 0.04728735  | Down | 0.002249582 | Hbb-bt        |
| 74280       | 1328 | 144.1094531 | 44.71684366 | -1.688274711 | 0.042481619 | Down | 0.0017885   | 1700084F23Rik |
| 15495       | 1698 | 17.75201471 | 5.277275857 | -1.750117464 | 0.034354593 | Down | 0.001132217 | Hsd3b4        |
| 547349      | 1451 | 100.8433496 | 29.97135373 | -1.750459792 | 0.035208054 | Down | 0.001194497 | LOC547349     |
| BGI_novel_1 | 862  | 9.76876861  | 2.771047636 | -1.817745204 | 0.029978671 | Down | 0.000812053 | NA            |
| BGI_novel_1 | 3026 | 48.06961382 | 13.06870959 | -1.879008517 | 0.01390321  | Down | 6.63E-05    | NA            |
| BGI_novel_1 | 2556 | 57.68736888 | 15.40292654 | -1.905050976 | 0.01353896  | Down | 4.76E-05    | NA            |
| BGI_novel_1 | 1276 | 41.79722362 | 10.18709872 | -2.036663884 | 0.014400365 | Down | 7.61E-05    | NA            |
| BGI_novel_1 | 397  | 11.04228141 | 2.179240526 | -2.341140931 | 0.009509372 | Down | 2.09E-05    | NA            |
| BGI_novel_1 | 3452 | 38.57553476 | 5.321488459 | -2.857784417 | 0.000193211 | Down | 6.66E-08    | NA            |
| BGI_novel_1 | 1245 | 23.25757059 | 2.520655881 | -3.205829325 | 1.58E-05    | Down | 2.43E-09    | NA            |
| BGI_novel_1 | 1444 | 33.91700666 | 3.41911858  | -3.310312487 | 9.64E-06    | Down | 8.32E-10    | NA            |
| BGI_novel_1 | 4273 | 179.3024219 | 3.837613963 | -5.546041571 | 1.03E-26    | Down | 4.46E-31    | NA            |
